# Supplementary material
Source: Royal Society of Chemistry journal article supplement (doi:10.1039/d6py00222f)
Supplement: d6py00222f1.pdf [file d6py00222f1.pdf]

## Supplementary Information

### **Binuclear Nickel Catalysts Enable One-Step Copolymerization of Ethylene with 2-Allylphenol to Phenol-Functionalized Branched Polyethylenes**

Yuan Lu, Yanshan Gao\*, Shuyang Yu, Yanan Zhao, Jie Yang, Xiu-Li Sun\*, Xiaoyan Wang and  
Yong Tang

State Key Laboratory of Organometallic Chemistry, Shanghai Institute of Organic Chemistry,  
Chinese Academy of Sciences, 345 Lingling Road, Shanghai 200032, China

Correspondence to: [gaoyanshan@sioc.ac.cn](mailto:gaoyanshan@sioc.ac.cn), [xlsun@sioc.ac.cn](mailto:xlsun@sioc.ac.cn)

## Table of Contents

|                                                                                            |    |
|--------------------------------------------------------------------------------------------|----|
| 1. Materials and Methods.....                                                              | 3  |
| 2. General Procedure for Olefin Copolymerizations with Polar Monomer.....                  | 3  |
| 3. Acetylation Procedure for Poly( <i>E-co-2-allylphenol</i> ).....                        | 4  |
| 4. NMR Spectra of Comonomers .....                                                         | 5  |
| 5. NMR Assignments of Poly( <i>E-co-2-allylphenol</i> ) .....                              | 9  |
| 6. Calculations of Comonomer Incorporation and Branching.....                              | 12 |
| 7. Representative NMR Spectrum of Poly( <i>E-co-2-allylphenol</i> ) after Acetylation..... | 13 |
| 8. NMR Spectra of polymer samples from Table 1 .....                                       | 13 |
| 9. NMR Spectra of polymer samples from Table 2 .....                                       | 16 |
| 10. NMR Spectra of polymer samples from Table 3 .....                                      | 21 |
| 11. GPC Traces of Polymer Samples.....                                                     | 26 |
| 12. DSC Traces of Polymer Samples.....                                                     | 37 |
| 13. NMR Spectra of 2-allylphenol + DEAC Mixture.....                                       | 46 |
| 14. Water Contact Angle Measurements .....                                                 | 48 |
| References .....                                                                           | 48 |

## 1. Materials and Methods

Toluene and other solvents used for catalyst synthesis and polymerization were purified using an MBraun SPS-800 system. Polymerization-grade ethylene was purified using an ethylene purification system developed by the Dalian Institute of Chemical Physics, CAS. 2-Allylphenol was dried over anhydrous  $\text{CaSO}_4$  and distilled under reduced pressure. Eugenol, estragole and allylbenzene were commercially available and were verified by  $^1\text{H}$  NMR prior to use. 4-Allylphenol<sup>[1]</sup>, 2-methoxy allylbenzene<sup>[2]</sup>, 2-allylphenoxy trimethylsilane<sup>[3]</sup>, and 2-allylphenoxy triisopropylsilane<sup>[4]</sup> were prepared according to literature procedures and were verified by  $^1\text{H}$  NMR.

Trimethylaluminum (TMA), triethylaluminum (TEA), triisobutylaluminium (TIBA) and diethylaluminum chloride (DEAC) were purchased from Jiangsu Yongjian Chemical Co., Ltd as neat liquids, and were diluted with toluene to 1.0 M solutions before use. Ethylaluminum dichloride (1.8 M in toluene) was purchased as a commercial reagent.

All air- and moisture-sensitive manipulations were carried out under high purity argon or nitrogen using standard Schlenk techniques or in a glovebox.  $^1\text{H}$  NMR,  $^{13}\text{C}$  NMR, DEPT-135, COSY, HSQC and HMBC spectra were recorded on Agilent (400 MHz, 600 MHz) or Varian (400 MHz) NMR spectrometer. Number-average molecular weight ( $M_n$ ), weight-average molecular weight ( $M_w$ ), and dispersity ( $\text{Đ}$ ) were determined using an Agilent PL-GPC 220 high-temperature gel permeation chromatograph at 150 °C (polystyrene calibration; 1,2,4-trichlorobenzene; 150°C). Poly(E-co-2-allylphenol) was acetylated prior to GPC analysis. DSC measurements were performed on a TA Instruments DSC 2500. Samples were heated from -80 °C to 180 °C at 10 °C /min under a nitrogen atmosphere, cooled to -80 °C at 10 °C /min for two cycles. The reported DSC data were collected from the second heating cycle.

## 2. General Procedure for Olefin Copolymerizations with Polar Monomer

(a) Polar monomer pretreated with  $\text{Et}_2\text{AlCl}$  in situ.

Under 1 atm of ethylene, a flame-dried two-neck flask equipped with a stir bar was charged with the specified amounts of toluene and  $\text{Et}_2\text{AlCl}$  solution at desired temperature. After stirring for 10 min, the polar monomer was added dropwise. The resulting mixture was stirred for 10 min, and then a toluene solution of the Ni catalyst was added to initiate the polymerization. The reaction mixture was quenched by pouring into 250 mL of acidified MeOH (concentrated HCl/MeOH =

1/10, v/v) and stirring at room temperature overnight. The precipitated polymer was collected by filtration, washed with MeOH, and dried under vacuum at 60 °C to a constant weight.

(b) Polar monomer pretreated with masking reagents for 12 h.

A flame-dried Schlenk tube equipped with a stir bar was charged with the specified amount of toluene and the masking reagent at 30 °C under argon atmosphere. The polar monomer was then added dropwise, and the mixture was stirred at 30 °C for 12 h prior to use in polymerization.

Under 1 atm of ethylene, a flame-dried two-neck flask equipped with a stir bar was charged with the specified amounts of toluene and Et<sub>2</sub>AlCl solution at 30 °C. After 10 min, the polar monomer solution pretreated with the masking reagent was added. The resulting mixture was stirred for 10 min, and then a toluene solution of the Ni catalyst was added to initiate polymerization. The reaction mixture was quenched by pouring into 250 mL of acidified MeOH (concentrated HCl/MeOH = 1/10, v/v), and the suspension was stirred at room temperature overnight. The precipitated polymer was collected, washed with MeOH, and dried under vacuum at 60 °C to a constant weight.

### **3. Acetylation Procedure for Poly(E-co-2-allylphenol)**

A thick-wall sealed vessel equipped with a stir bar was charged with poly(E-co-2-allylphenol) (~50 mg) and 1,2-dichlorobenzene (8 mL) under argon atmosphere. The mixture was heated to 60 °C until the polymer fully dissolved and then allowed to cool to room temperature. Et<sub>3</sub>N (2 mL) and AcCl (0.25 mL) were added, the vessel was sealed, and the mixture was reheated to 60 °C. After stirring for 30 min, the hot reaction solution was poured into MeOH (100 mL). The precipitated polymer was collected by filtration, washed with MeOH, and dried under vacuum at 60 °C to a constant weight. The polymer product was characterized by <sup>1</sup>H NMR, confirming complete conversion of phenol to acetate groups.

#### 4. NMR Spectra of Comonomers

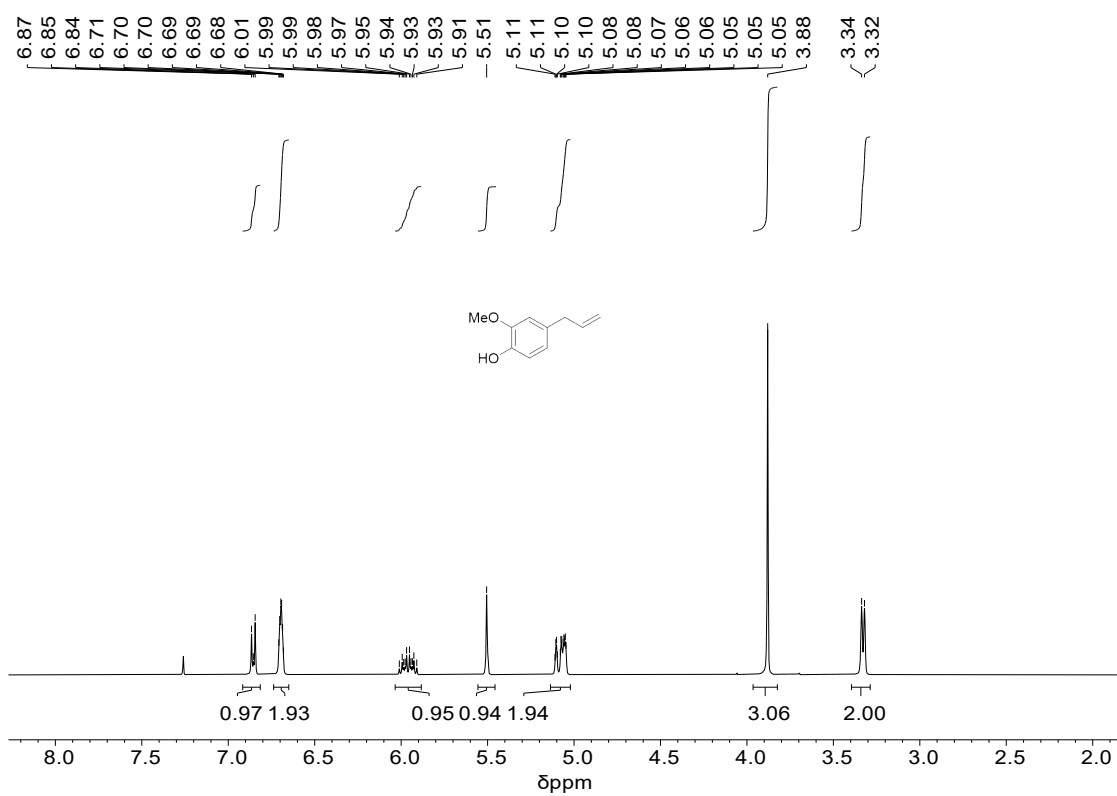

Figure S1.  $^1\text{H}$  NMR spectrum (400 MHz) of eugenol in  $\text{CDCl}_3$ .

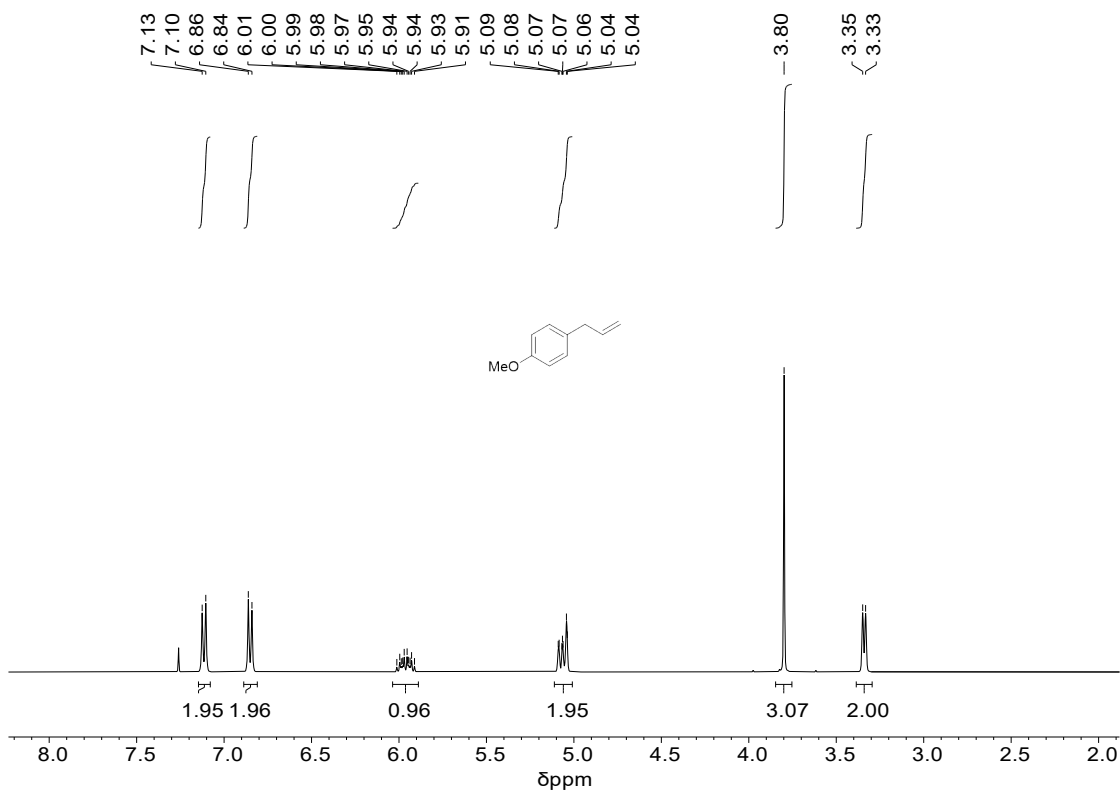

Figure S2.  $^1\text{H}$  NMR spectrum (400 MHz) of estragole in  $\text{CDCl}_3$ .

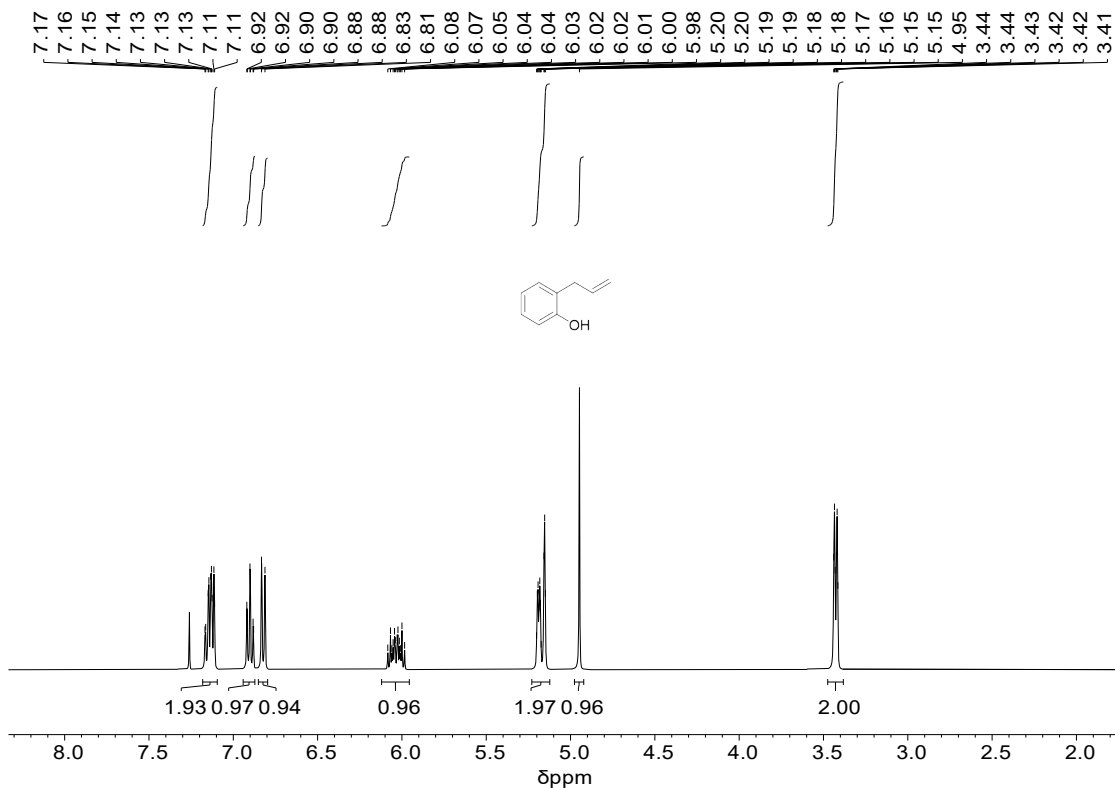

**Figure S3.** <sup>1</sup>H NMR spectrum (400 MHz) of 2-allylphenol in CDCl<sub>3</sub>.

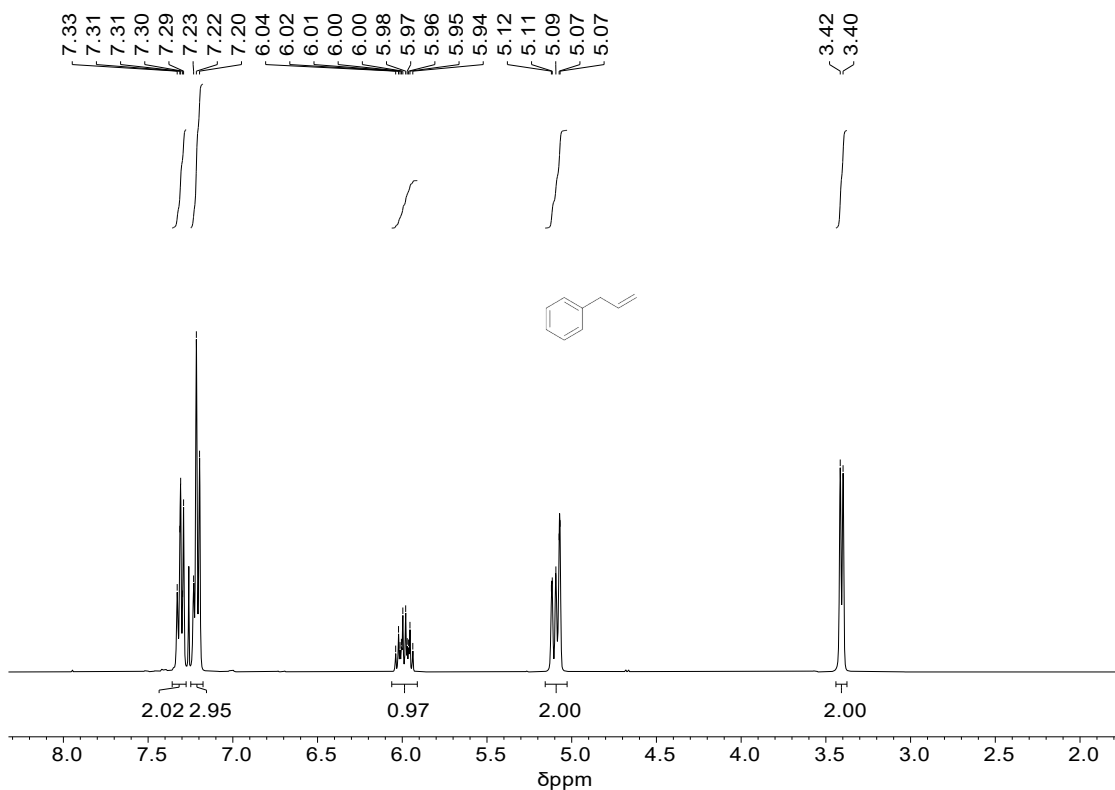

**Figure S4.** <sup>1</sup>H NMR spectrum (400 MHz) of allylbenzene in CDCl<sub>3</sub>.

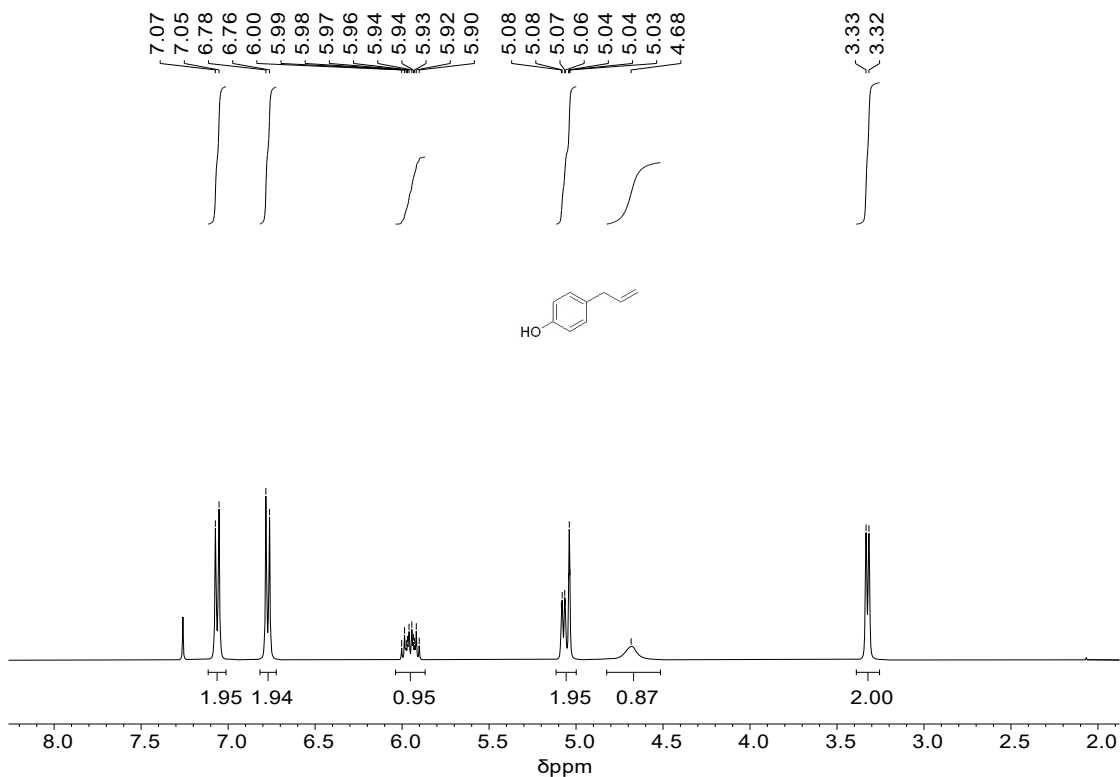

**Figure S5.** <sup>1</sup>H NMR spectrum (400 MHz) of 4-allylphenol in CDCl<sub>3</sub>.

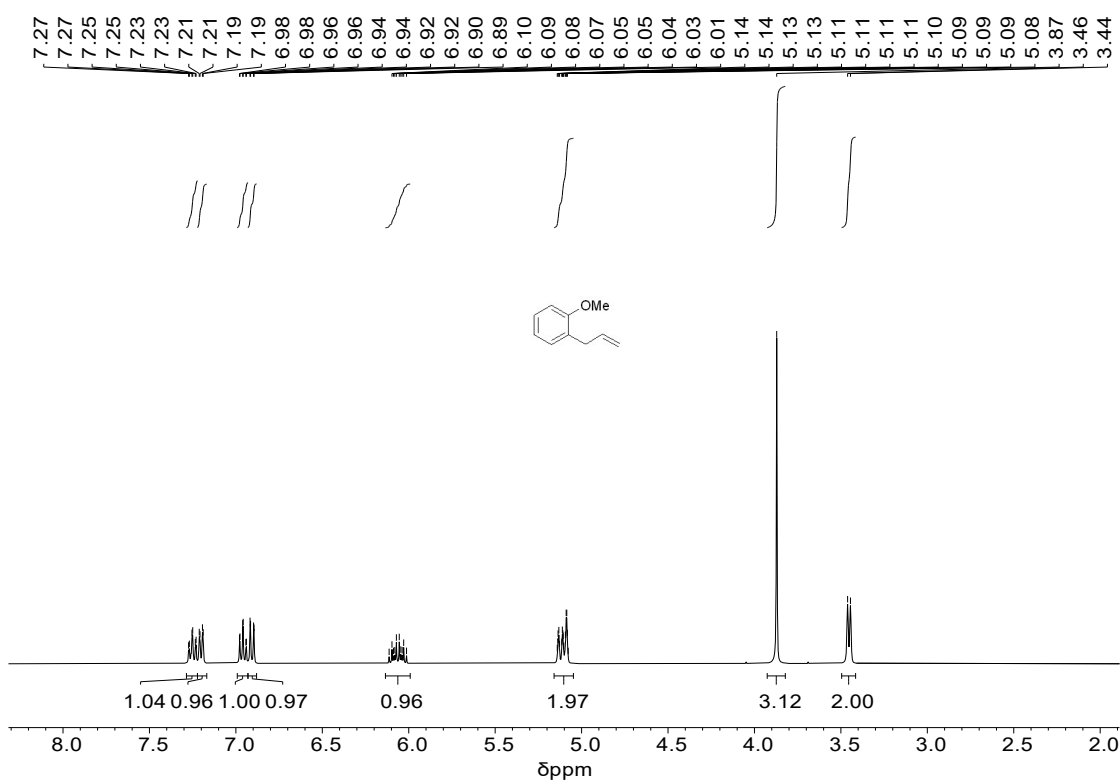

**Figure S6.** <sup>1</sup>H NMR spectrum (400 MHz) of 2-methoxy allylbenzene in CDCl<sub>3</sub>.

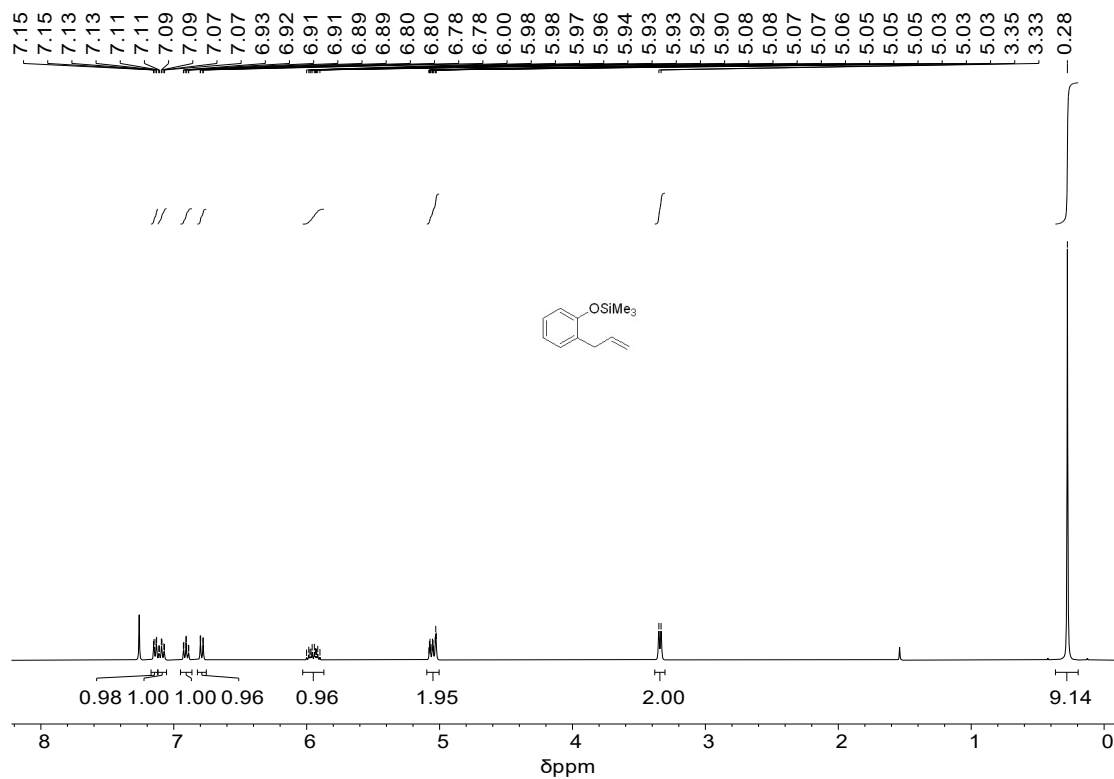

**Figure S7.**  $^1\text{H}$  NMR spectrum (400 MHz) of 2-allylphenoxy trimethylsilane in  $\text{CDCl}_3$ .

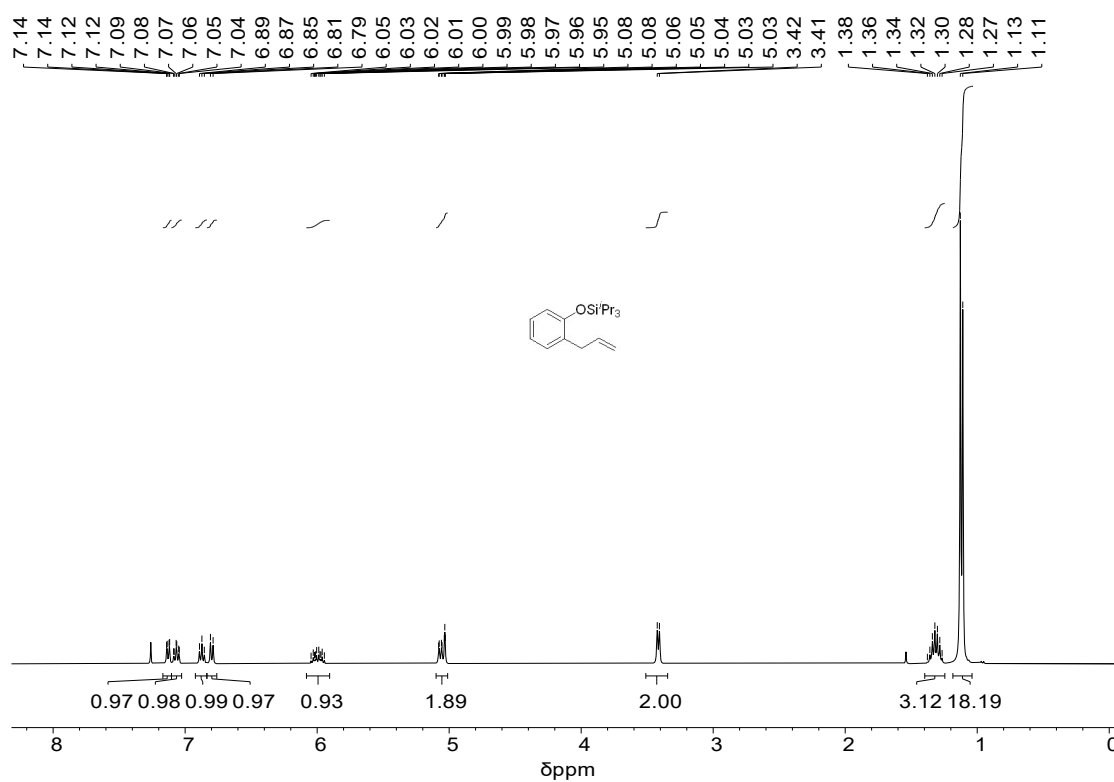

**Figure S8.**  $^1\text{H}$  NMR spectrum (400 MHz) of 2-allylphenoxy triisopropylsilane in  $\text{CDCl}_3$ .

## 5. NMR Assignments of Poly(*E-co*-2-allylphenol)

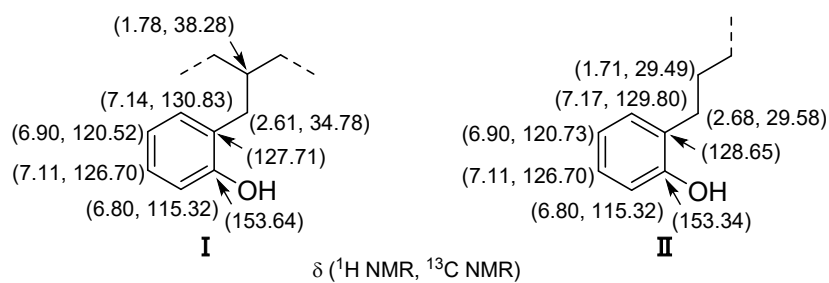

**Figure S9.** NMR assignments of poly(*E-co*-2-allylphenol)

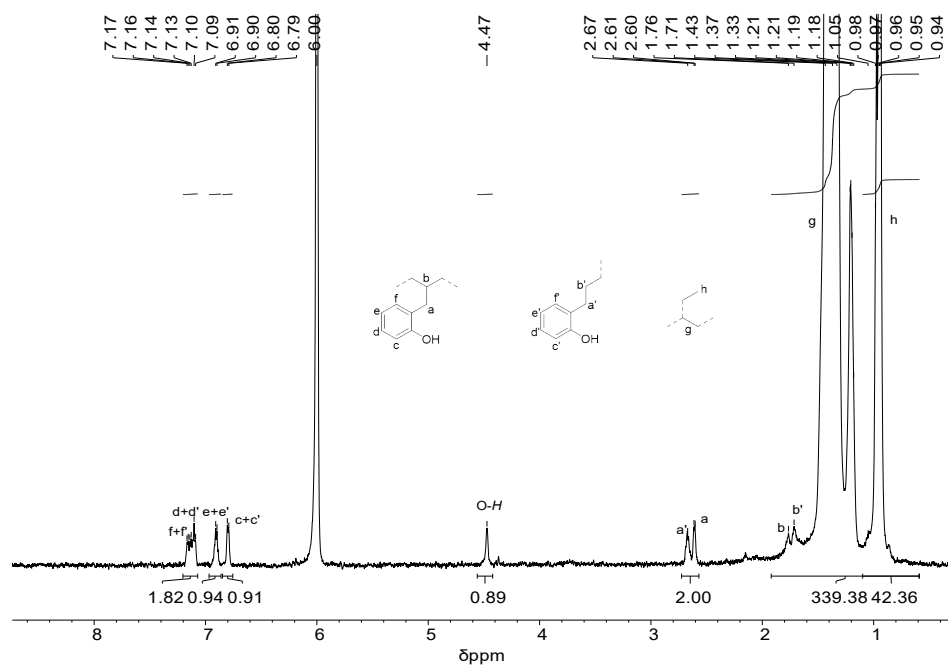

**Figure S10.**  $^1\text{H}$  NMR spectrum (600 MHz) of poly(*E-co*-2-allylphenol) (Table 3, entry 2 & Table 2, entry 1) in 1,1,2,2-tetrachloroethane- $d_2$  at 120 °C.

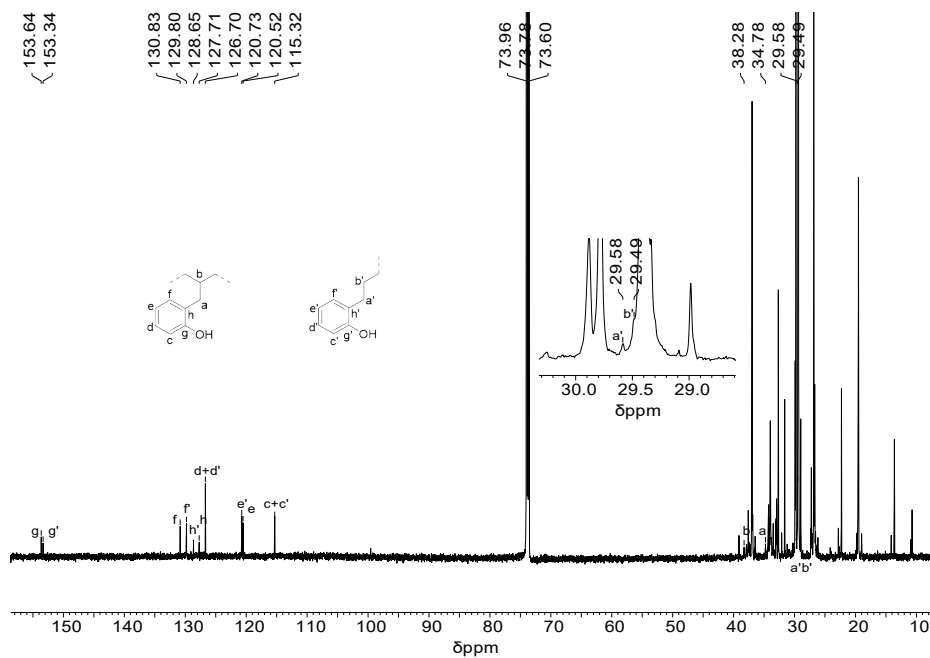

**Figure S11.**  $^{13}\text{C}$  NMR spectrum (150 MHz) of poly(*E-co*-2-allylphenol) (Table 3, entry 2 & Table 2, entry 1) in 1,1,2,2-tetrachloroethane- $d_2$  at 120 °C.

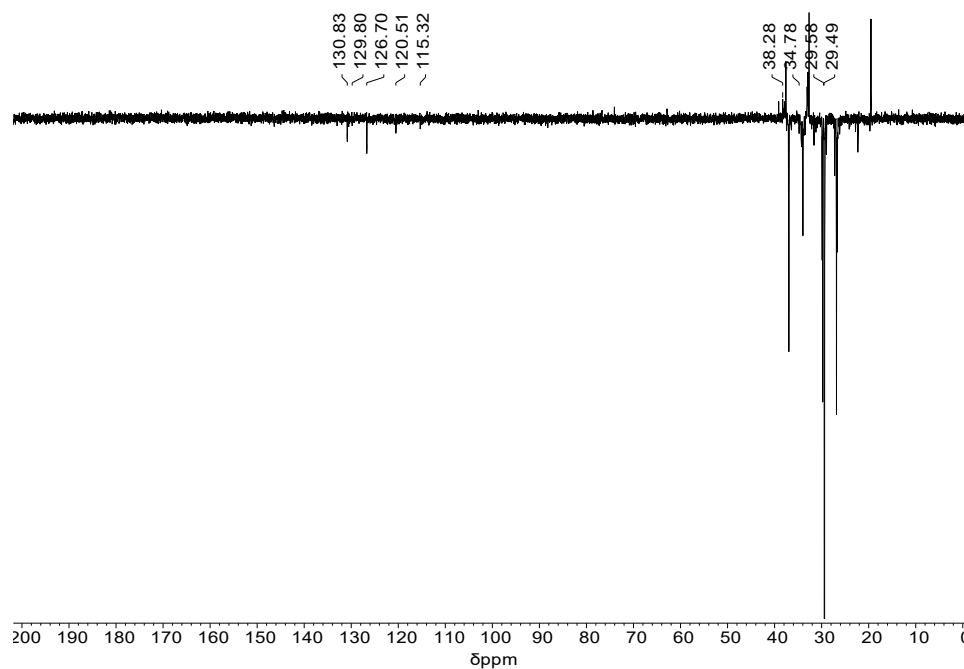

**Figure S12.** DEPT 135 spectrum of poly(*E-co*-2-allylphenol) (Table 3, entry 2 & Table 2, entry 1) in 1,1,2,2-tetrachloroethane- $d_2$  at 120 °C.

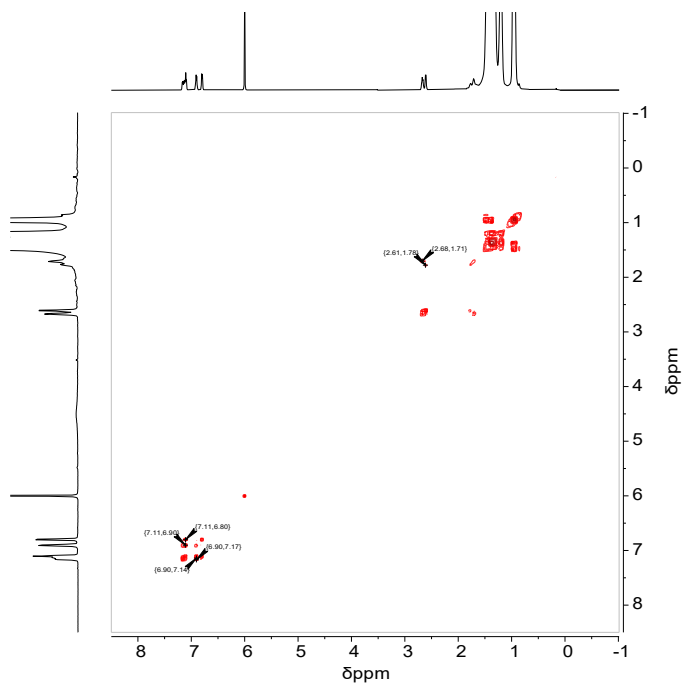

**Figure S13.** COSY spectrum of poly(*E-co-2*-allylphenol) (Table 3, entry 2 & Table 2, entry 1) in 1,1,2,2-tetrachloroethane- $d_2$  at 120 °C.

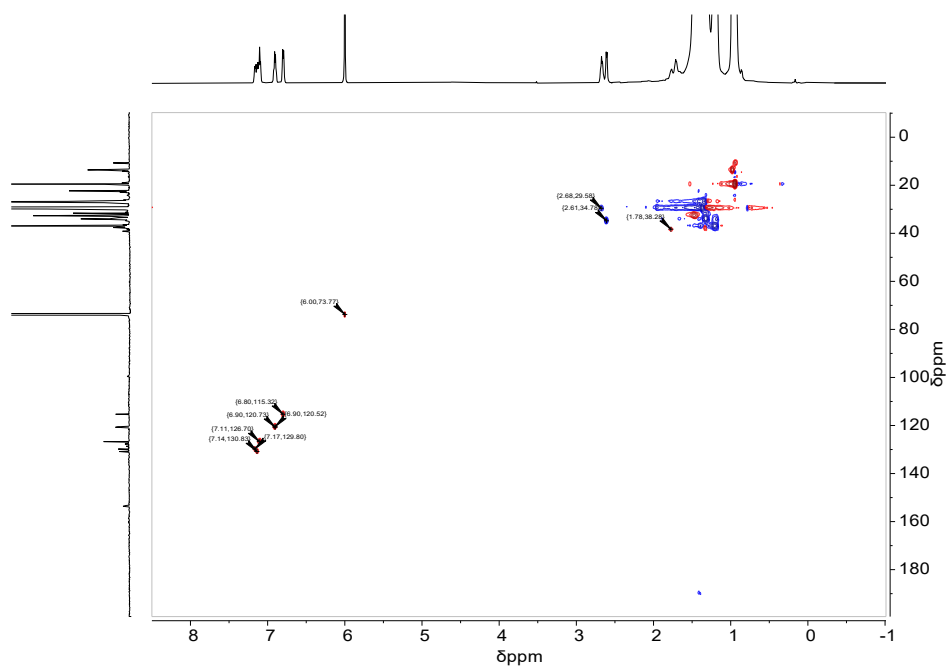

**Figure S14.** HSQC spectrum of poly(*E-co-2*-allylphenol) (Table 3, entry 2 & Table 2, entry 1) in 1,1,2,2-tetrachloroethane- $d_2$  at 120 °C.

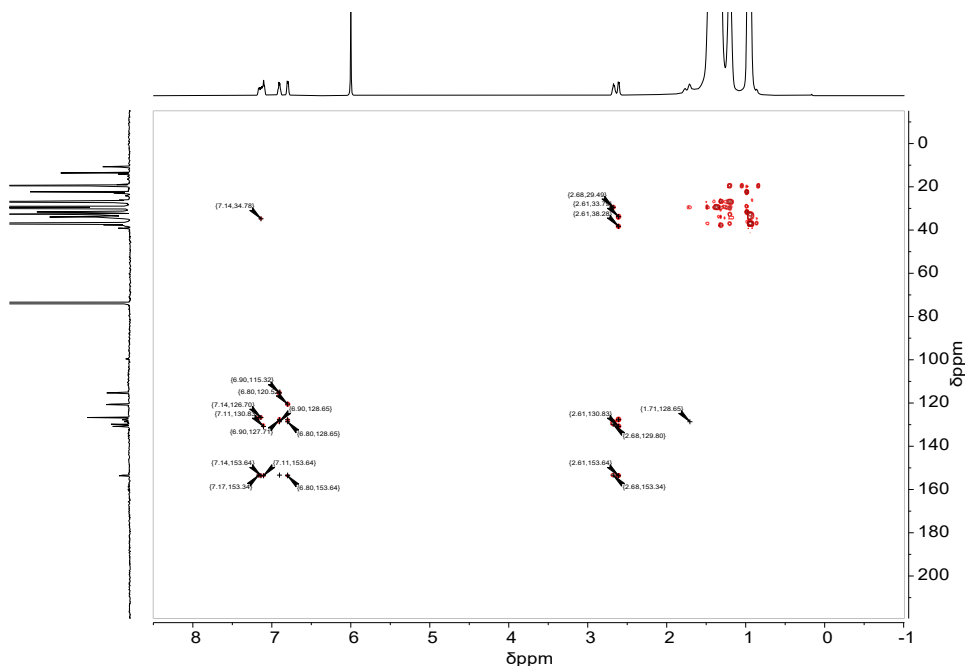

**Figure S15.** HMBC spectrum of poly(E-co-2-allylphenol) (Table 3, entry 2 & Table 2, entry 1) in 1,1,2,2-tetrachloroethane- $d_2$  at 120 °C.

## 6. Calculations of Comonomer Incorporation and Branching.

The 2-allylphenol comonomer content was determined by quantitative  $^1\text{H}$  NMR analysis. The comonomer composition is expressed as a mole fraction of 2-allylphenol ( $x$ ) and ethylene ( $1-x$ ). For quantification, the combined integral of signals **b**, **b'**, **c**, **c'**, **h** and **i** (denoted as  $I_{b+b'+c+c'+h+i}$ ) was defined as **n**, and the combined integral of signals **a** and **a'** (denoted as  $I_{a+a'}$ ) was normalized to 2.

$$\frac{2x}{3x + 4(1-x)} = \frac{2}{n}$$

$$x = \frac{4}{n+1} \times 100\%$$

The comonomer contents of other copolymers, *i.e.* poly(E-co-eugenol), poly(E-co-estragole), poly(E-co-allylbenzene), poly(E-co-4-allylphenol), poly(E-co-2-methoxy allylbenzene), poly(E-co-2-allylphenoxy trimethylsilane), and poly(E-co-2-allylphenoxy triisopropylsilane) were determined from quantitative  $^1\text{H}$  NMR analysis using the same method as described above.

The amount of methyl groups ( $N_{\text{Me groups}/1000\text{C}}$ ) based on the  $^1\text{H}$  NMR spectra was determined according to literature methods<sup>[5, 6]</sup>.

$$N_{\text{Me groups}/1000\text{C}} = 2 \times I_{\text{Me}} / (3 \times I_{\text{tot}}) \times 1000$$

## 7. Representative NMR Spectrum of Poly(E-co-2-allylphenol) after Acetylation

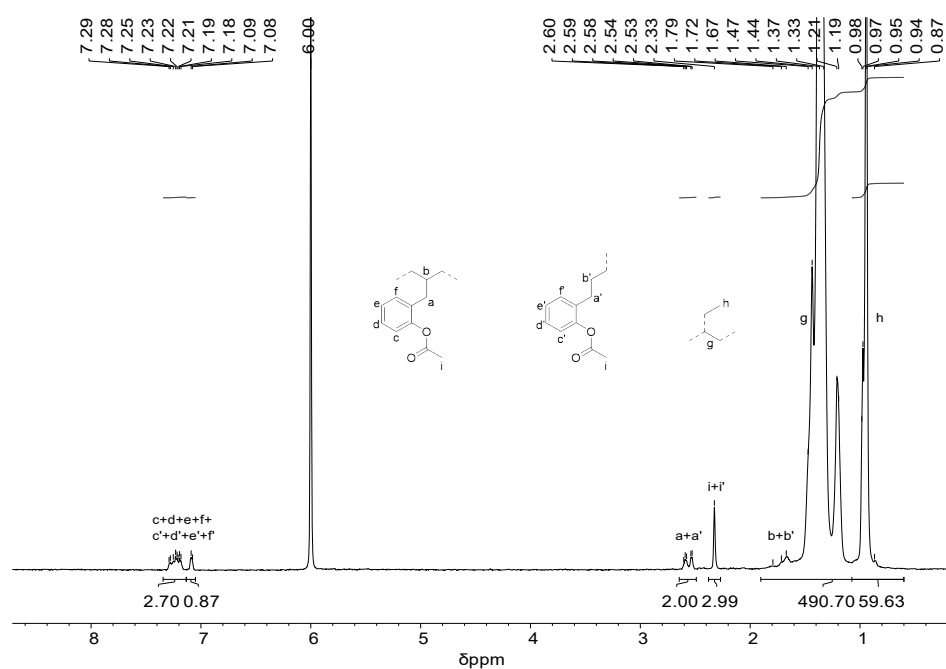

**Figure S16.**  $^1\text{H}$  NMR spectrum (600 MHz) of poly(E-co-2-allylphenol) (Table 2, Entry 3) after acetylation in 1,1,2,2-tetrachloroethane- $d_2$  at 120 °C.

## 8. NMR Spectra of polymer samples from Table 1

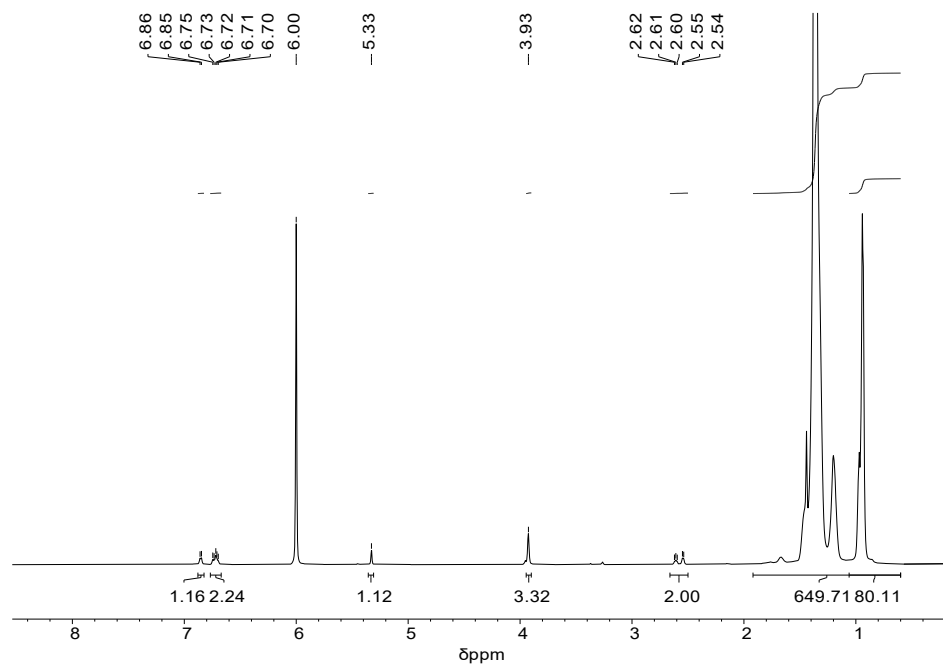

**Figure S17.**  $^1\text{H}$  NMR spectrum (600 MHz) of poly(E-co-eugenol) (Table 1, Entry 1) in 1,1,2,2-tetrachloroethane- $d_2$  at 120 °C.

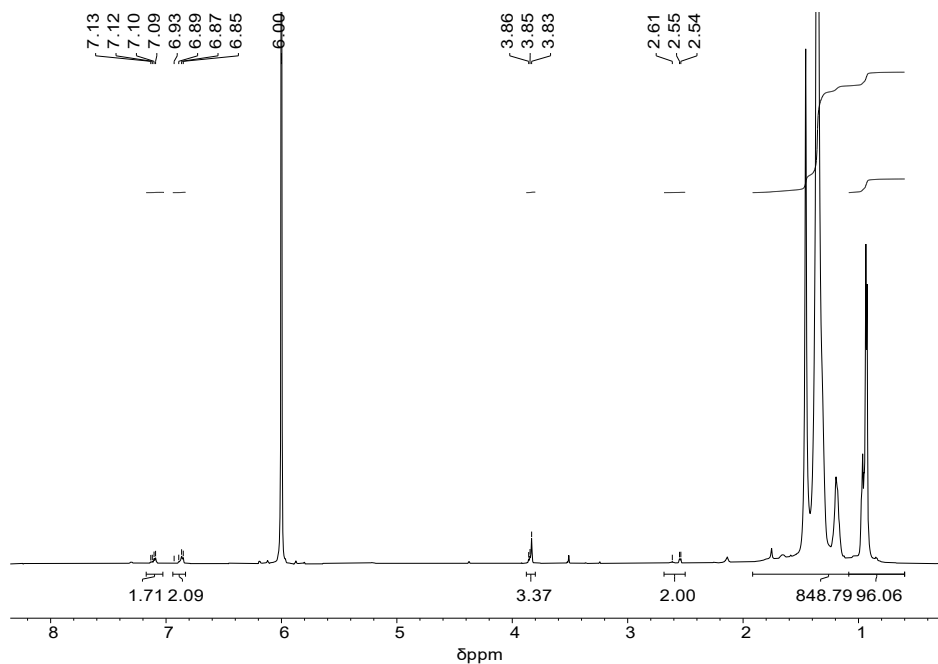

**Figure S18.**  $^1\text{H}$  NMR spectrum (600 MHz) of poly(*E-co-estragole*) (Table 1, Entry 2) in 1,1,2,2-tetrachloroethane- $d_2$  at 120 °C.

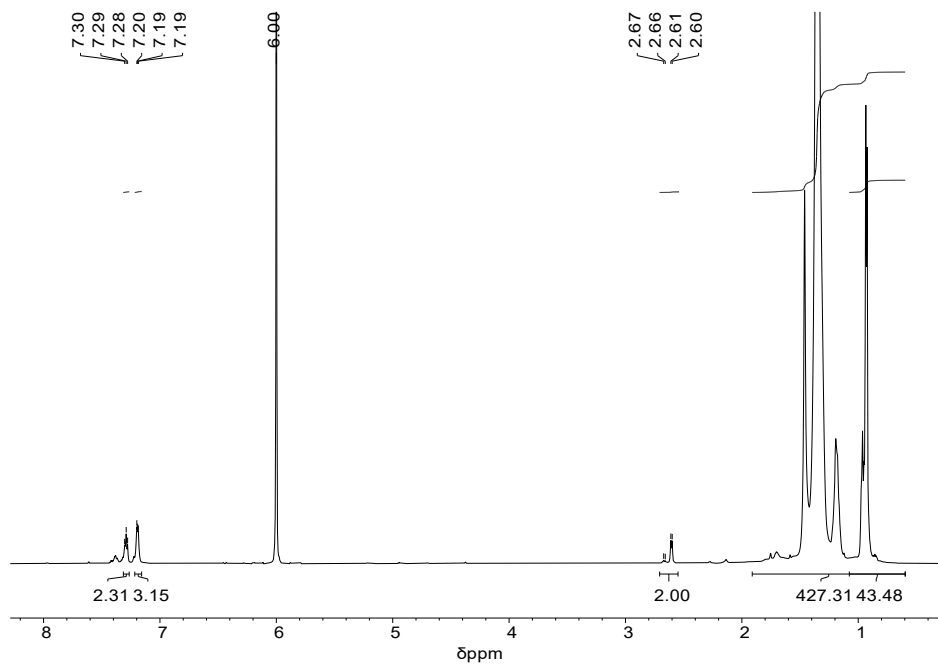

**Figure S19.**  $^1\text{H}$  NMR spectrum (600 MHz) of poly(*E-co-allylbenzene*) (Table 1, Entry 4) in 1,1,2,2-tetrachloroethane- $d_2$  at 120 °C.

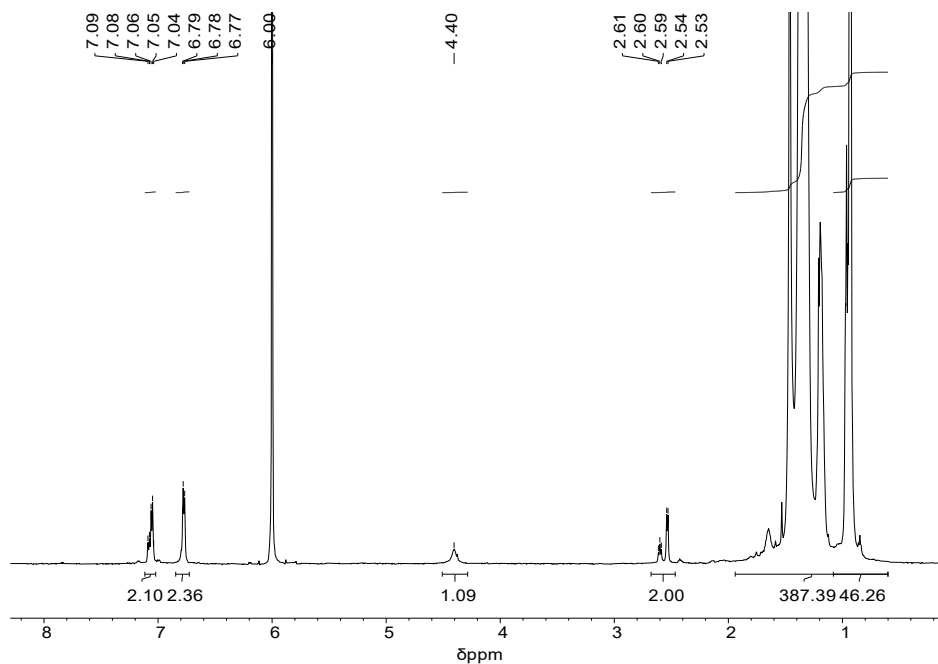

**Figure S20.**  $^1\text{H}$  NMR spectrum (600 MHz) of poly(*E-co*-4-allylphenol) (Table 1, Entry 5) in 1,1,2,2-tetrachloroethane- $d_2$  at 120 °C.

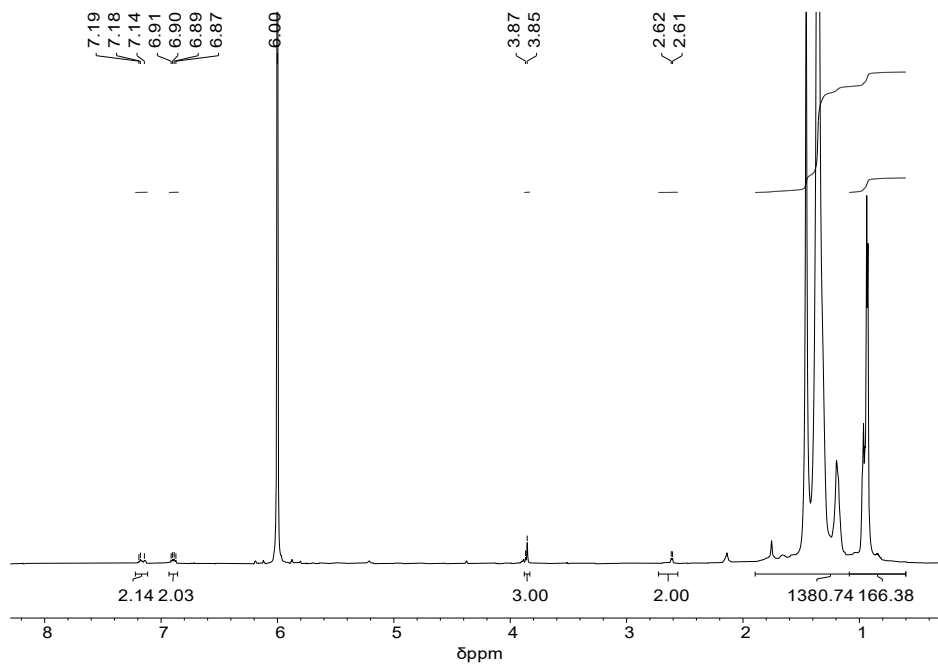

**Figure S21.**  $^1\text{H}$  NMR spectrum (600 MHz) of poly(*E-co*-2-methoxy allylbenzene) (Table 1, Entry 6) in 1,1,2,2-tetrachloroethane- $d_2$  at 120 °C.

## 9. NMR Spectra of polymer samples from Table 2

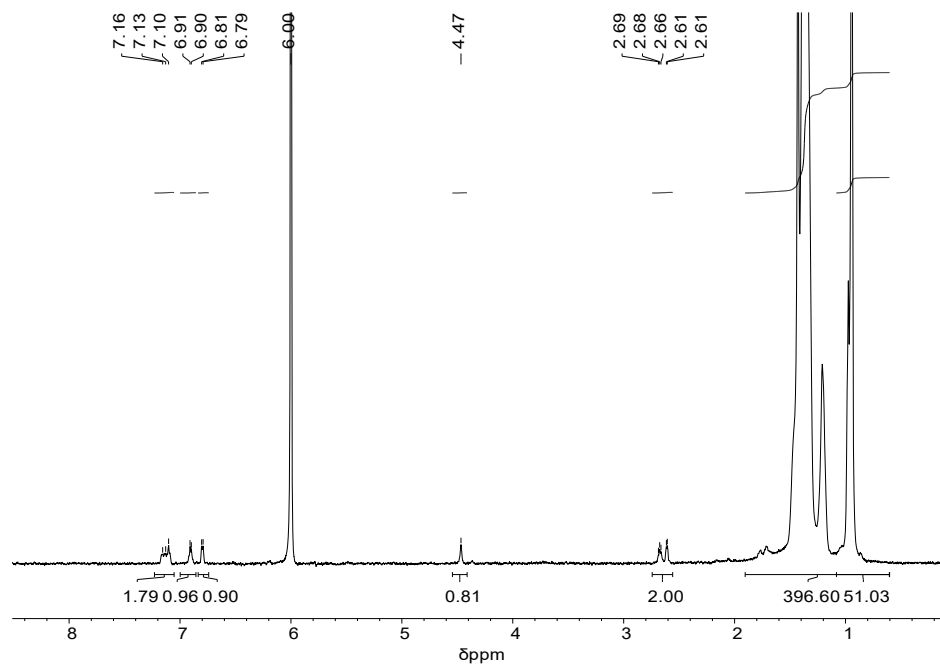

**Figure S22.** <sup>1</sup>H NMR spectrum (600 MHz) of poly(*E-co*-2-allylphenol) (Table 2, Entry 2 & Table 1, entry 3) in 1,1,2,2-tetrachloroethane-*d*<sub>2</sub> at 120 °C.

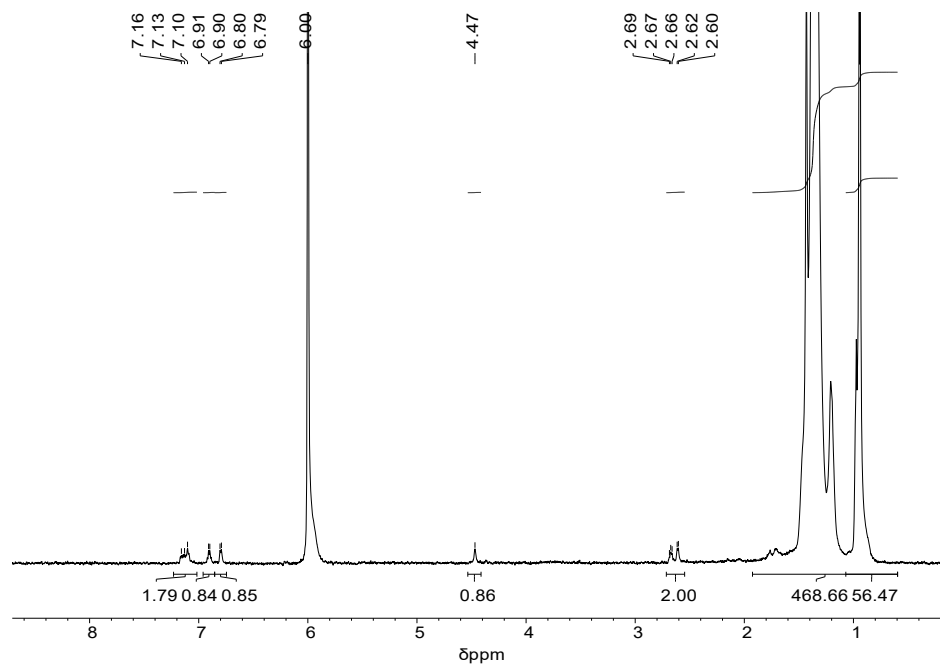

**Figure S23.** <sup>1</sup>H NMR spectrum (600 MHz) of poly(*E-co*-2-allylphenol) (Table 2, Entry 3) in 1,1,2,2-tetrachloroethane-*d*<sub>2</sub> at 120 °C.

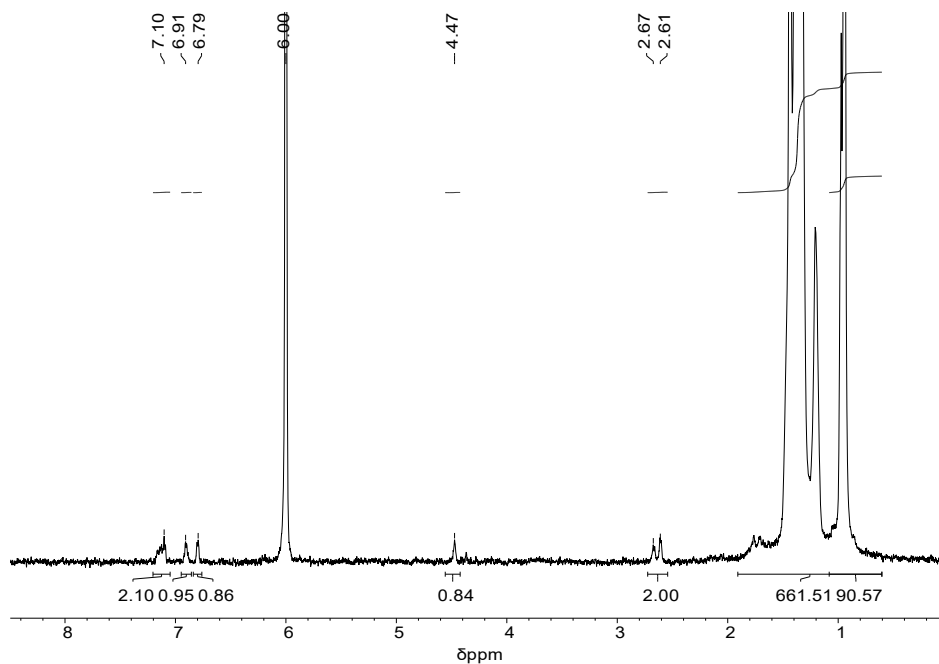

**Figure S24.**  $^1\text{H}$  NMR spectrum (600 MHz) of poly(*E-co*-2-allylphenol) (Table 2, Entry 4) in 1,1,2,2-tetrachloroethane- $d_2$  at 120 °C.

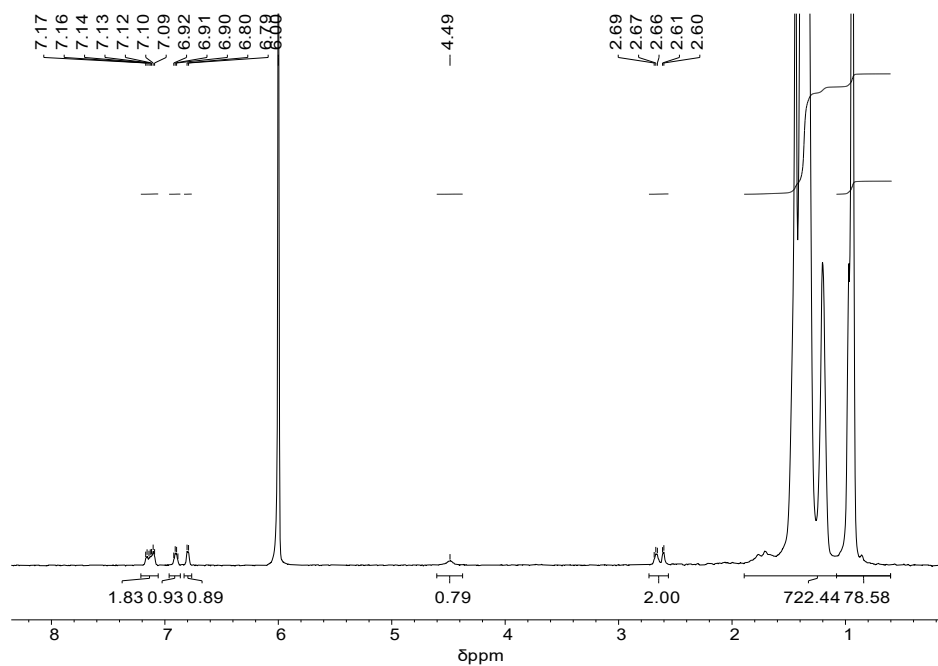

**Figure S25.**  $^1\text{H}$  NMR spectrum (600 MHz) of poly(*E-co*-2-allylphenol) (Table 2, Entry 5) in 1,1,2,2-tetrachloroethane- $d_2$  at 120 °C.

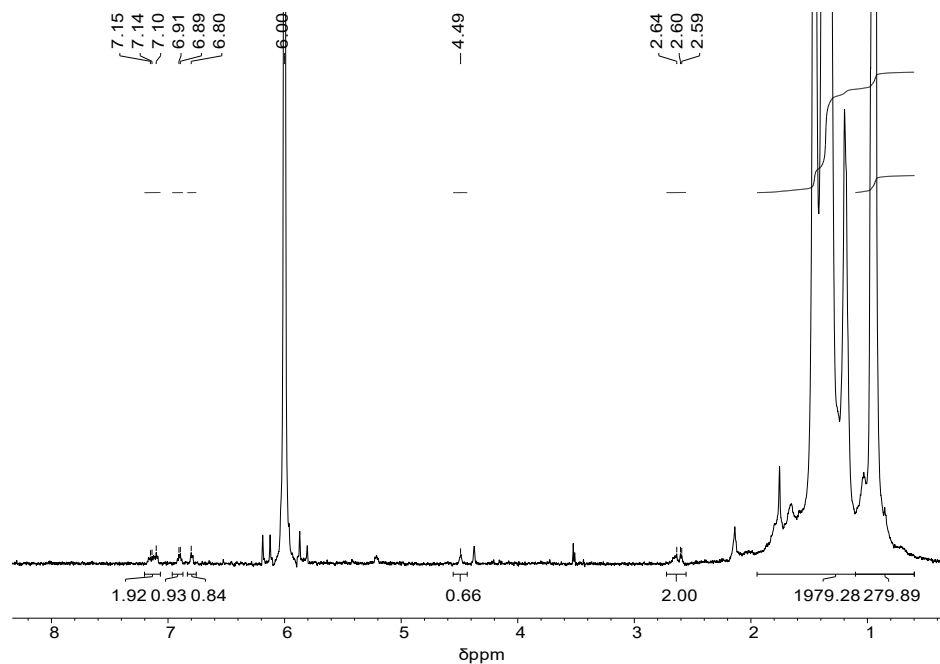

**Figure S26.**  $^1\text{H}$  NMR spectrum (600 MHz) of poly(*E-co*-2-allylphenol) (Table 2, Entry 6) in 1,1,2,2-tetrachloroethane- $d_2$  at 120 °C.

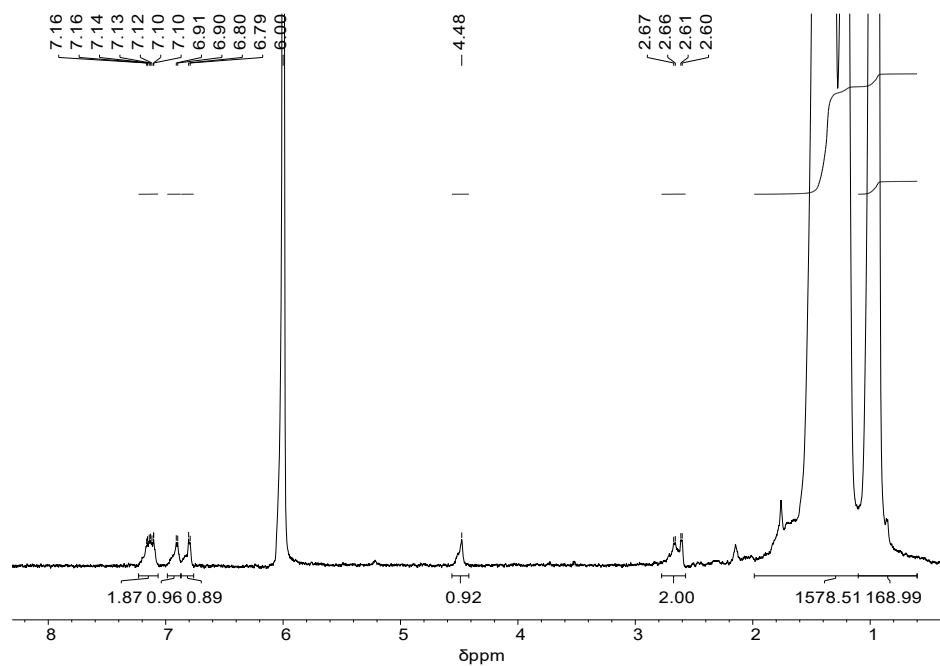

**Figure S27.**  $^1\text{H}$  NMR spectrum (600 MHz) of poly(*E-co*-2-allylphenol) (Table 2, Entry 7) in 1,1,2,2-tetrachloroethane- $d_2$  at 120 °C.

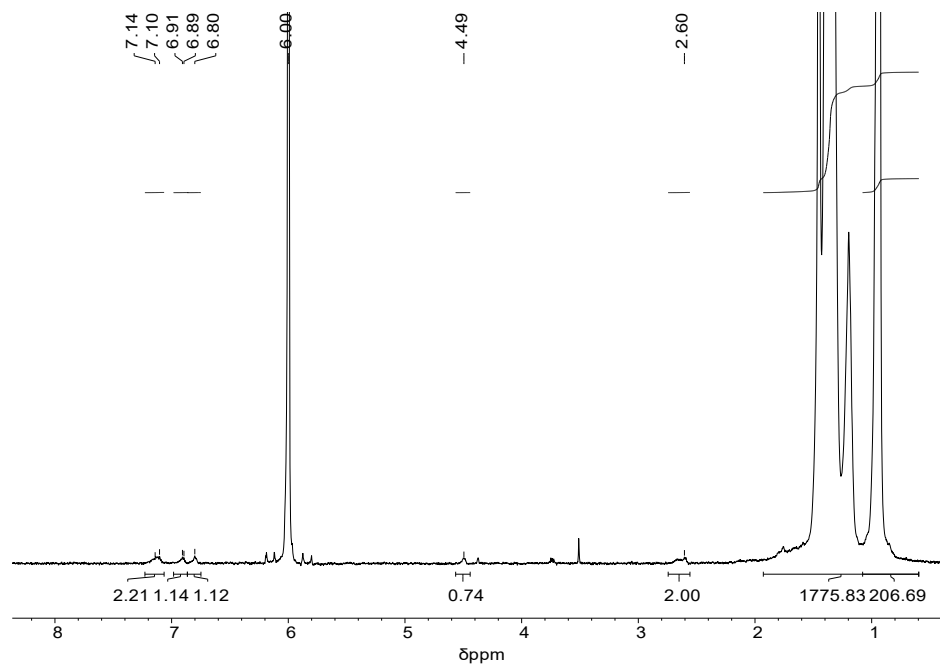

**Figure S28.**  $^1\text{H}$  NMR spectrum (600 MHz) of poly(*E-co*-2-allylphenol) (Table 2, Entry 8) in 1,1,2,2-tetrachloroethane- $d_2$  at 120 °C.

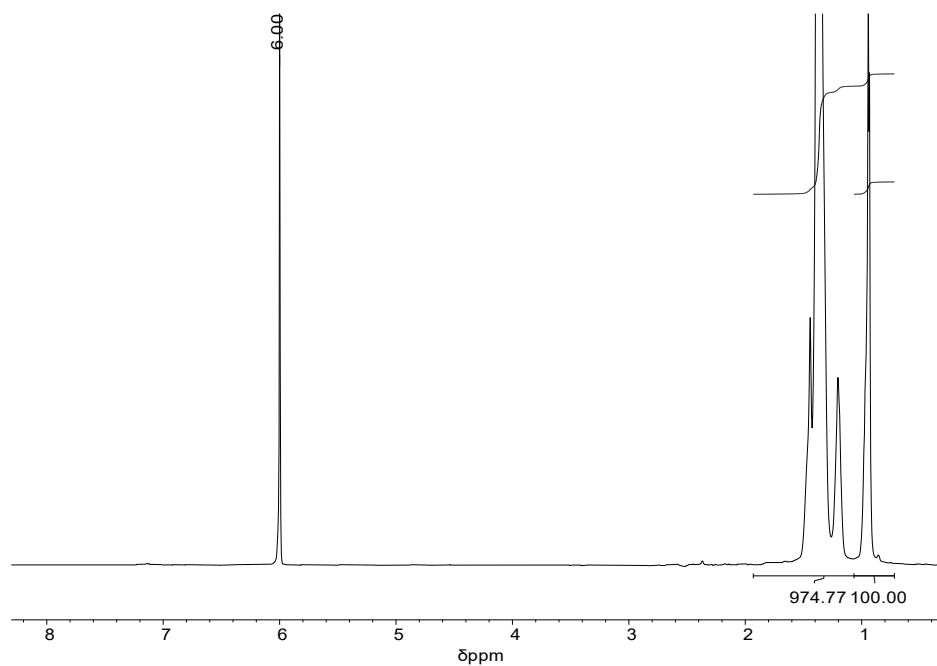

**Figure S29.**  $^1\text{H}$  NMR spectrum (600 MHz) of poly(*E-co*-2-allylphenol) (Table 2, Entry 9) in 1,1,2,2-tetrachloroethane- $d_2$  at 120 °C.

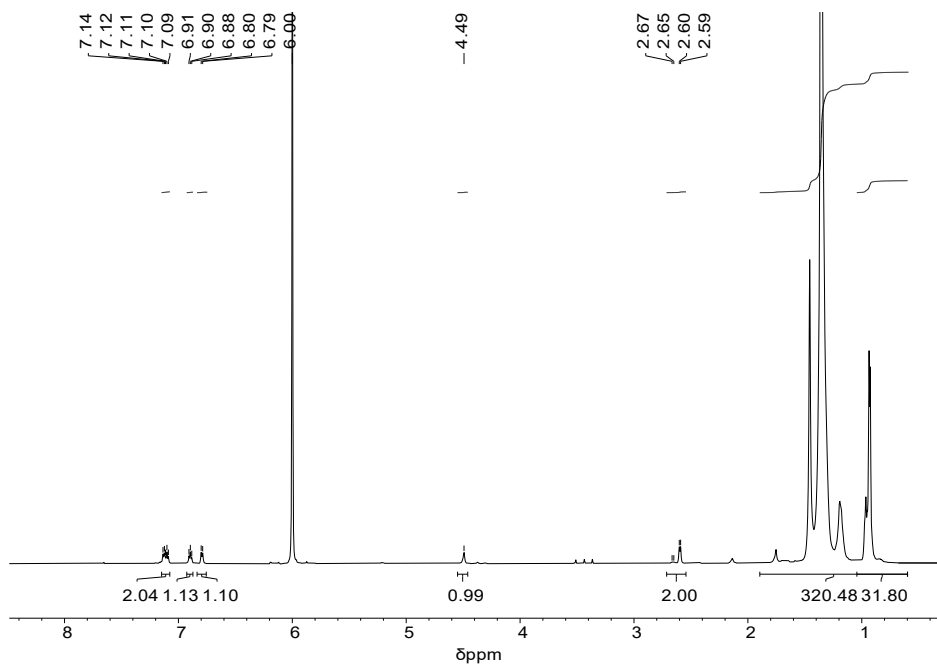

**Figure S30.**  $^1\text{H}$  NMR spectrum (600 MHz) of poly(E-co-2-allylphenoxy trimethylsilane) (Table 2, Entry 10) in 1,1,2,2-tetrachloroethane- $d_2$  at 120 °C.

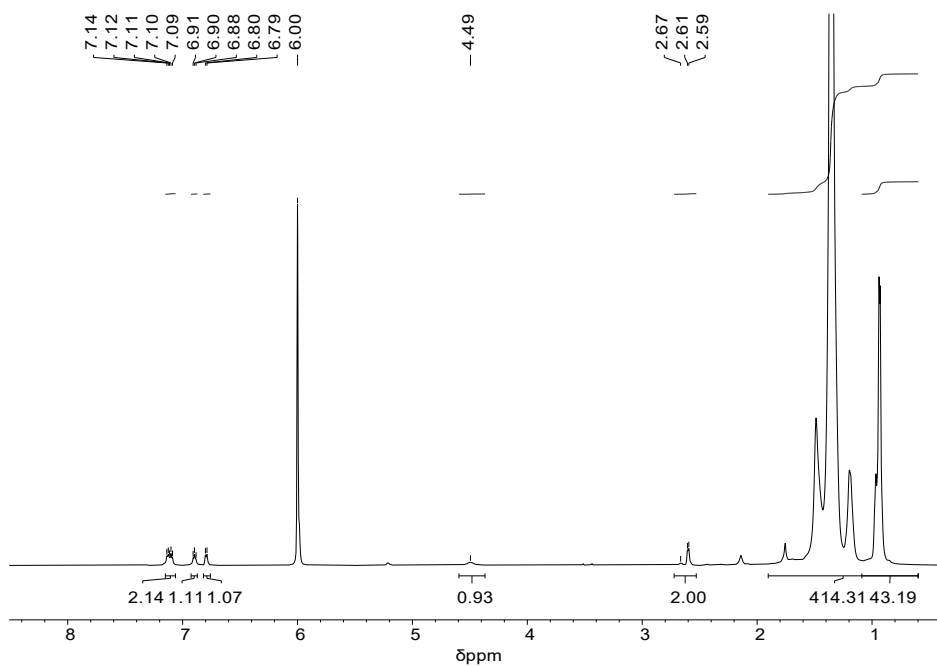

**Figure S31.**  $^1\text{H}$  NMR spectrum (600 MHz) of poly(E-co-2-allylphenoxy trimethylsilane) (Table 2, Entry 11) in 1,1,2,2-tetrachloroethane- $d_2$  at 120 °C.

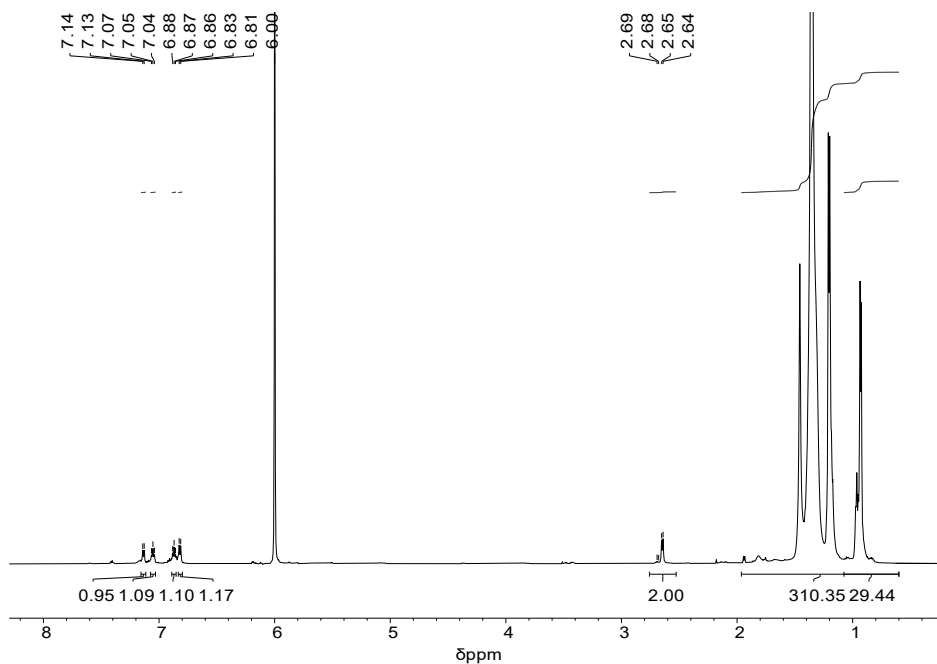

**Figure S32.**  $^1\text{H}$  NMR spectrum (600 MHz) of poly(E-co-2-allylphenoxy triisopropylsilane) (Table 2, Entry 12) in 1,1,2,2-tetrachloroethane- $d_2$  at 120  $^\circ\text{C}$ .

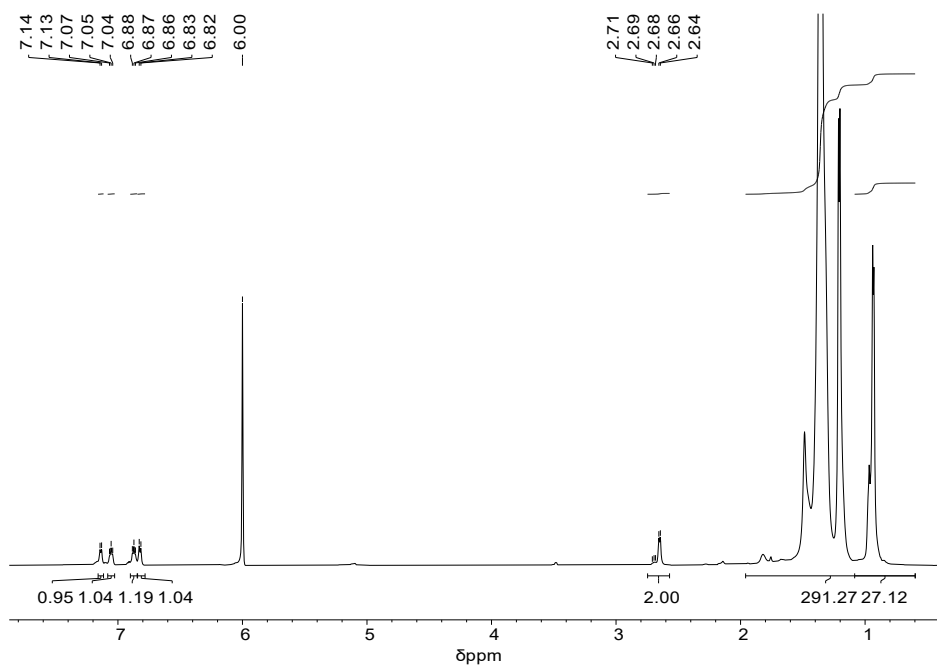

**Figure S33.**  $^1\text{H}$  NMR spectrum (600 MHz) of poly(E-co-2-allylphenoxy triisopropylsilane) (Table 2, Entry 13) in 1,1,2,2-tetrachloroethane- $d_2$  at 120  $^\circ\text{C}$ .

### 10. NMR Spectra of polymer samples from Table 3

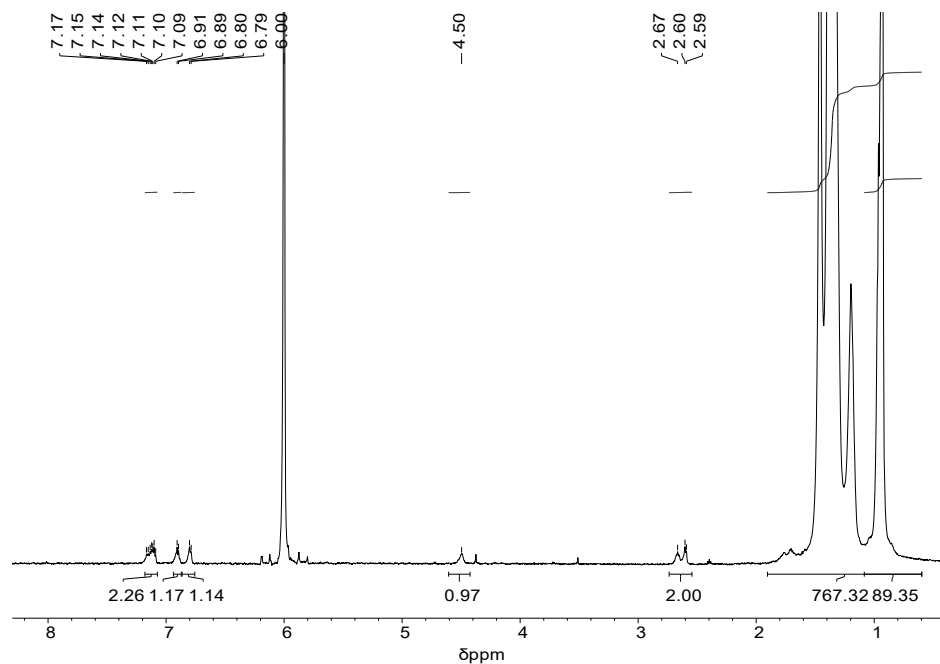

**Figure S34.**  $^1\text{H}$  NMR spectrum (600 MHz) of poly(*E-co*-2-allylphenol) (Table 3, Entry 1) in 1,1,2,2-tetrachloroethane- $d_2$  at 120 °C.

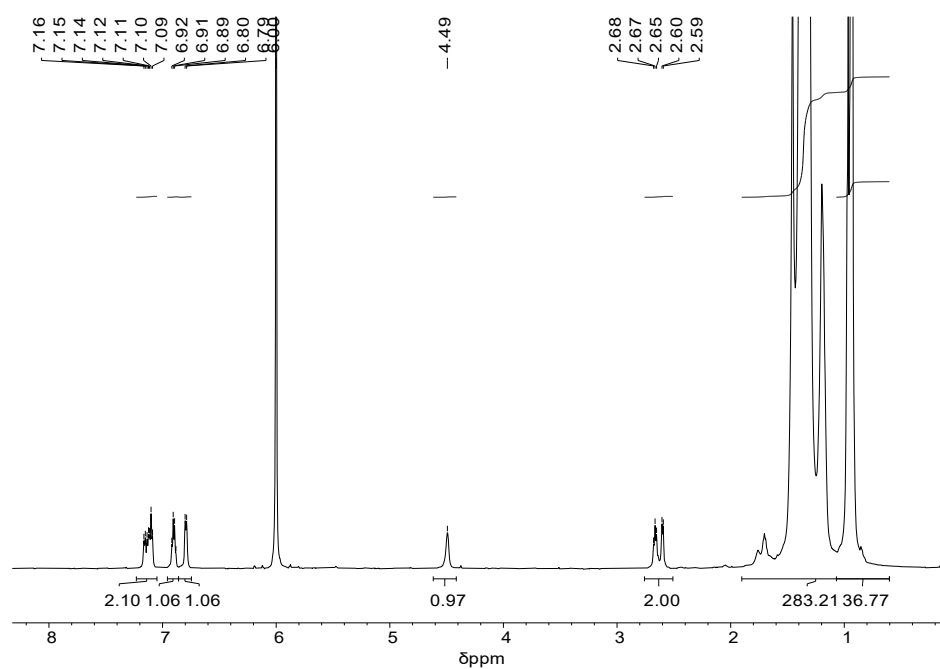

**Figure S35.**  $^1\text{H}$  NMR spectrum (600 MHz) of poly(*E-co*-2-allylphenol) (Table 3, Entry 3) in 1,1,2,2-tetrachloroethane- $d_2$  at 120 °C.

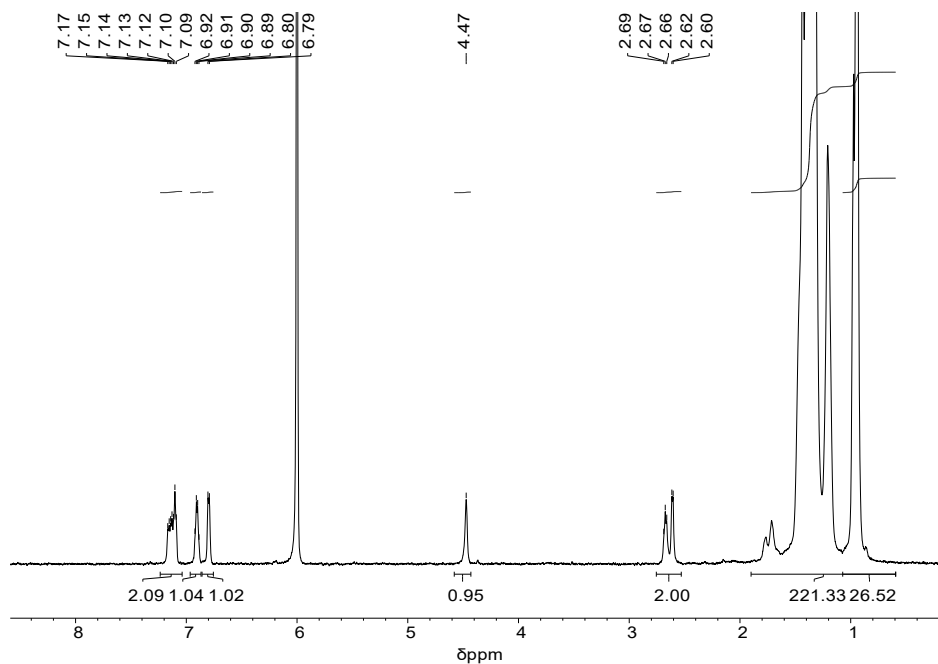

**Figure S36.**  $^1\text{H}$  NMR spectrum (600 MHz) of poly(*E-co*-2-allylphenol) (Table 3, Entry 4) in 1,1,2,2-tetrachloroethane- $d_2$  at 120 °C.

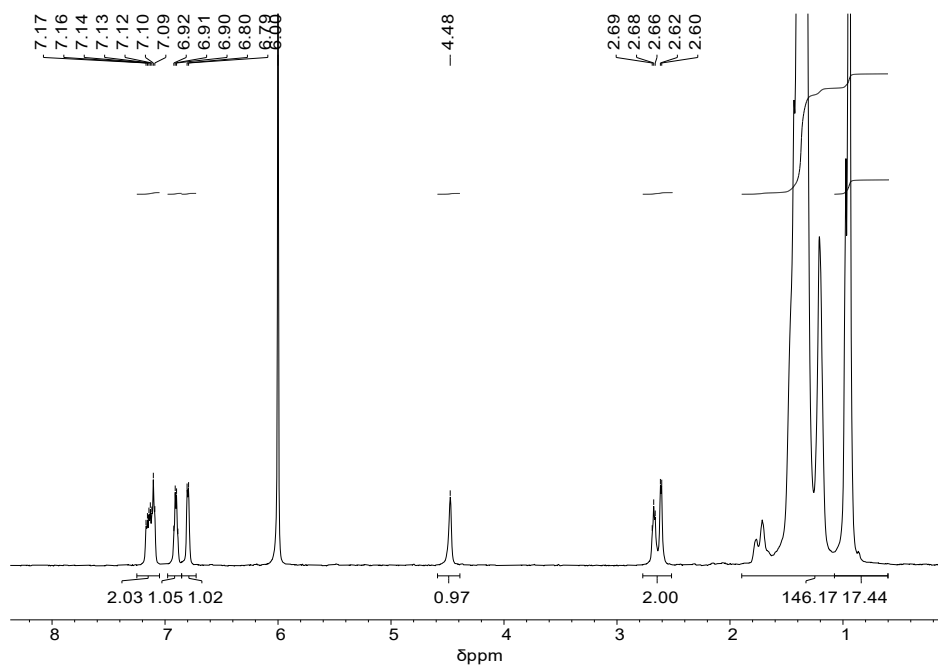

**Figure S37.**  $^1\text{H}$  NMR spectrum (600 MHz) of poly(*E-co*-2-allylphenol) (Table 3, Entry 5) in 1,1,2,2-tetrachloroethane- $d_2$  at 120 °C.

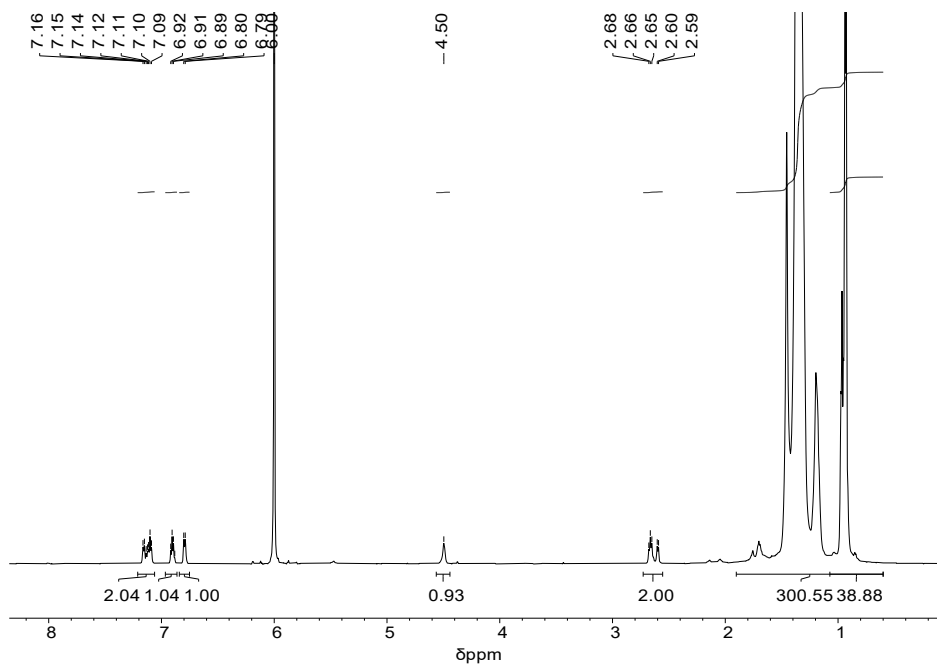

**Figure S38.**  $^1\text{H}$  NMR spectrum (600 MHz) of poly(*E-co*-2-allylphenol) (Table 3, Entry 6) in 1,1,2,2-tetrachloroethane- $d_2$  at 120 °C.

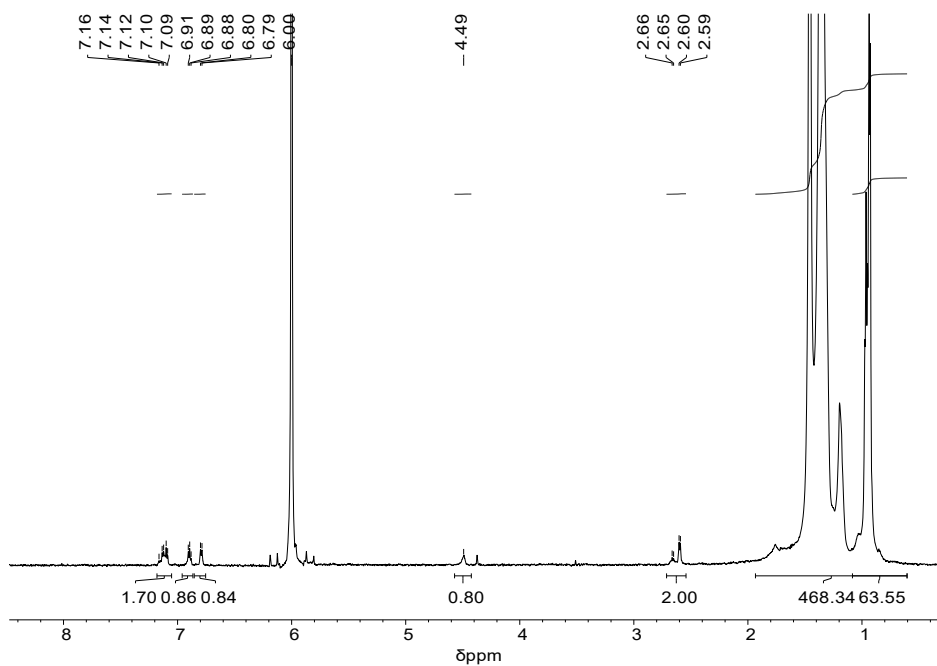

**Figure S39.**  $^1\text{H}$  NMR spectrum (600 MHz) of poly(*E-co*-2-allylphenol) (Table 3, Entry 7) in 1,1,2,2-tetrachloroethane- $d_2$  at 120 °C.

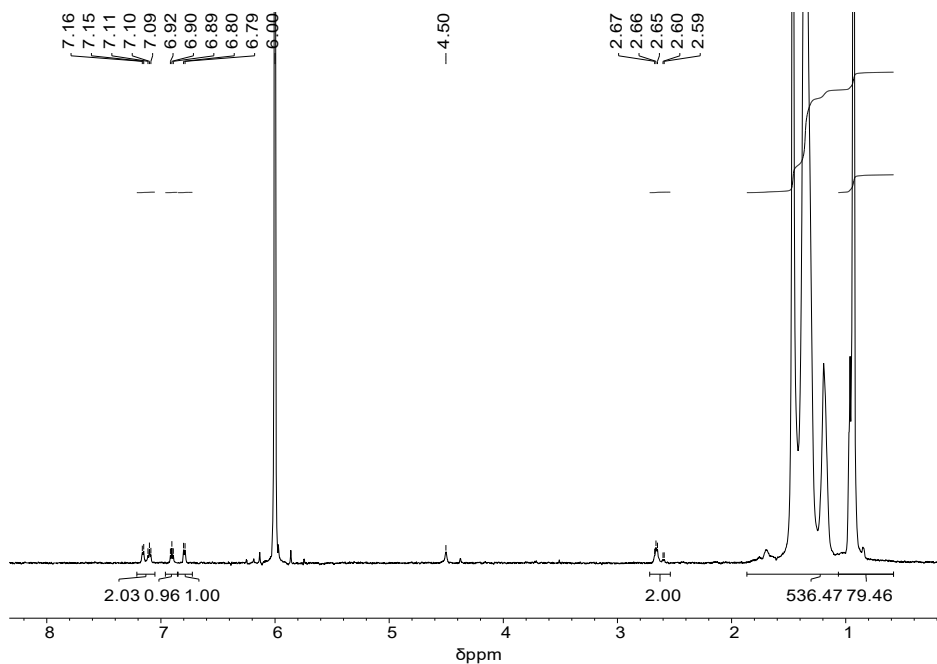

**Figure S40.**  $^1\text{H}$  NMR spectrum (600 MHz) of poly(*E-co*-2-allylphenol) (Table 3, Entry 8) in 1,1,2,2-tetrachloroethane- $d_2$  at 120 °C.

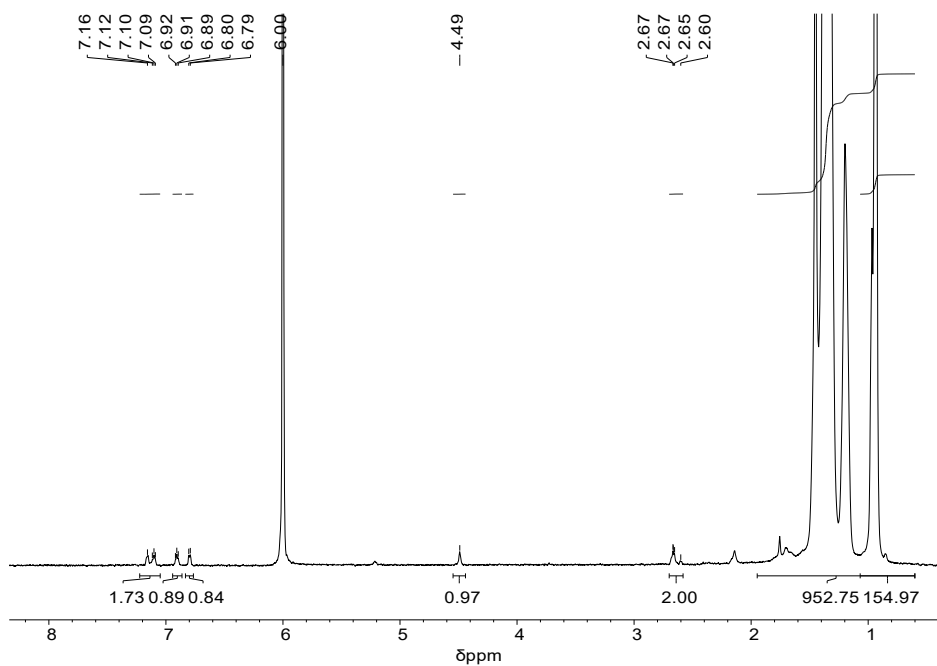

**Figure S41.**  $^1\text{H}$  NMR spectrum (600 MHz) of poly(*E-co*-2-allylphenol) (Table 3, Entry 9) in 1,1,2,2-tetrachloroethane- $d_2$  at 120 °C.

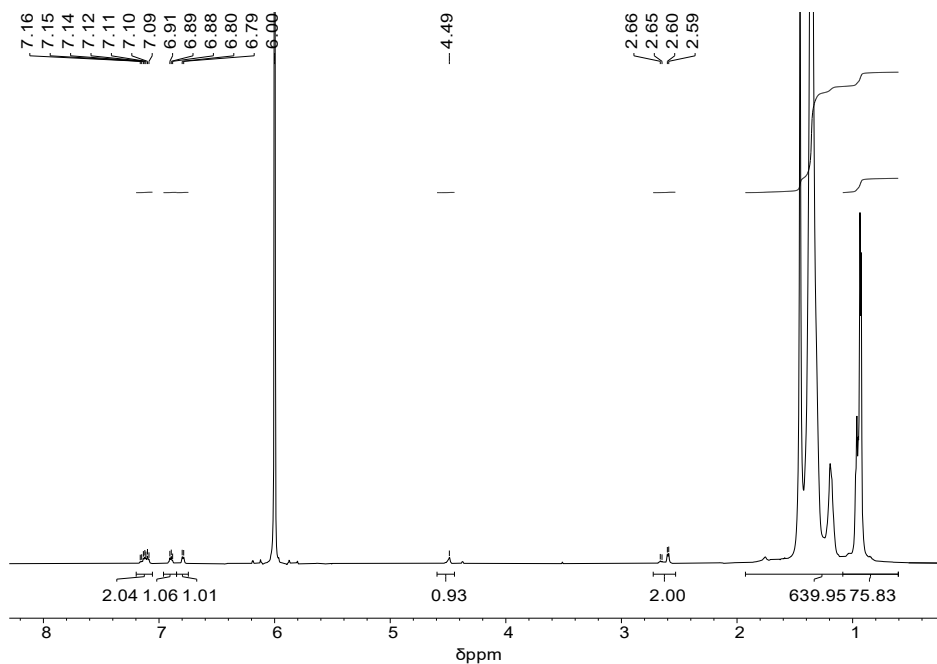

**Figure S42.**  $^1\text{H}$  NMR spectrum (600 MHz) of poly(*E-co*-2-allylphenol) (Table 3, Entry 10) in 1,1,2,2-tetrachloroethane- $d_2$  at 120 °C.

## 11. GPC Traces of Polymer Samples

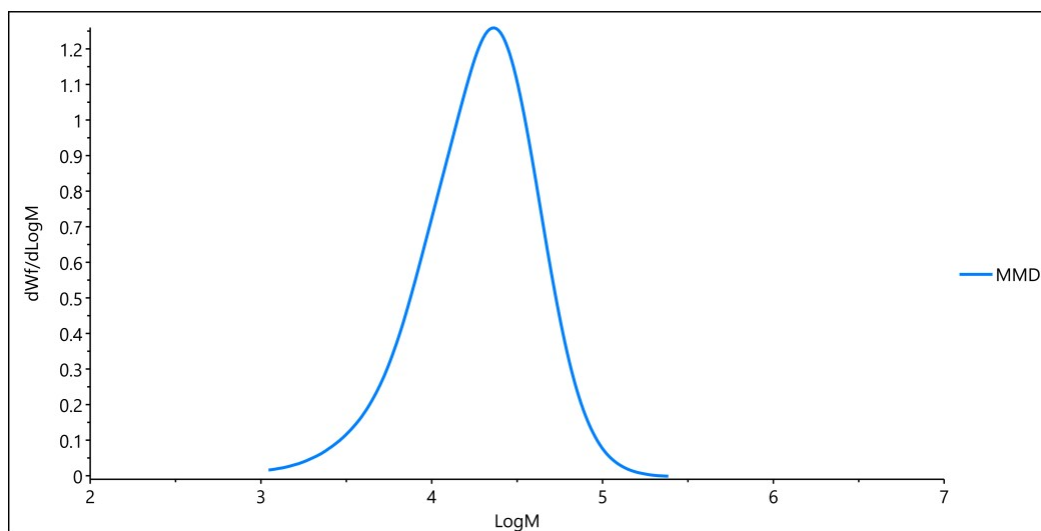

### Results

|         |       |       |
|---------|-------|-------|
| Mw      | 24642 | g/mol |
| Mn      | 13264 | g/mol |
| Mw / Mn | 1.86  |       |
| Mz      | 39075 | g/mol |
| Mp      | 22985 | g/mol |
| Mv      | 22972 | g/mol |
| IVmwd   | 0.64  | dL/g  |

**Figure S43.** GPC trace of poly(*E-co*-estragole) (Table 1, Entry 2).

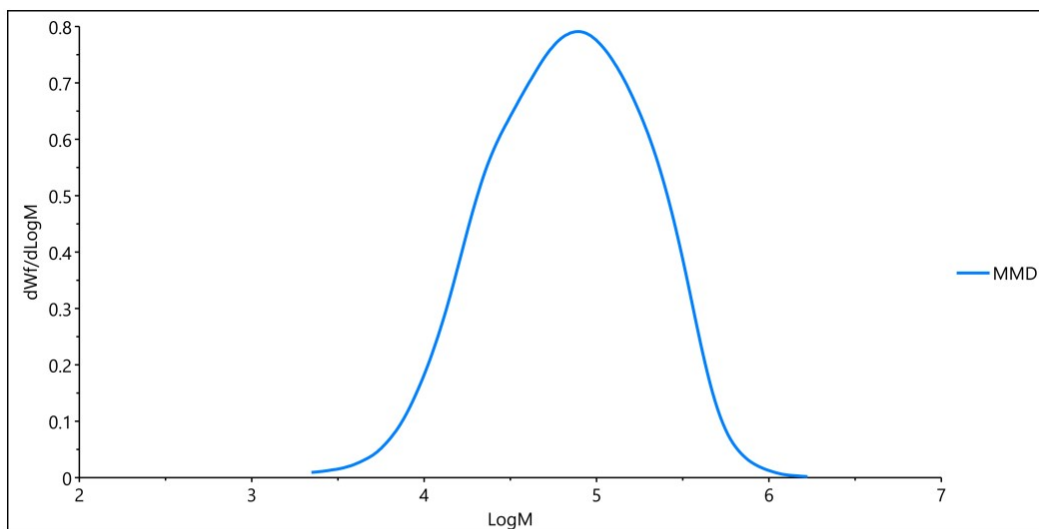

**Results**

|         |        |       |
|---------|--------|-------|
| Mw      | 112373 | g/mol |
| Mn      | 38432  | g/mol |
| Mw / Mn | 2.92   |       |
| Mz      | 248308 | g/mol |
| Mp      | 78191  | g/mol |
| Mv      | 98817  | g/mol |
| IVmwd   | 1.85   | dL/g  |

**Figure S44.** GPC trace of poly(*E-co*-2-allylphenol) after acetylation (Table 1, Entry 3).

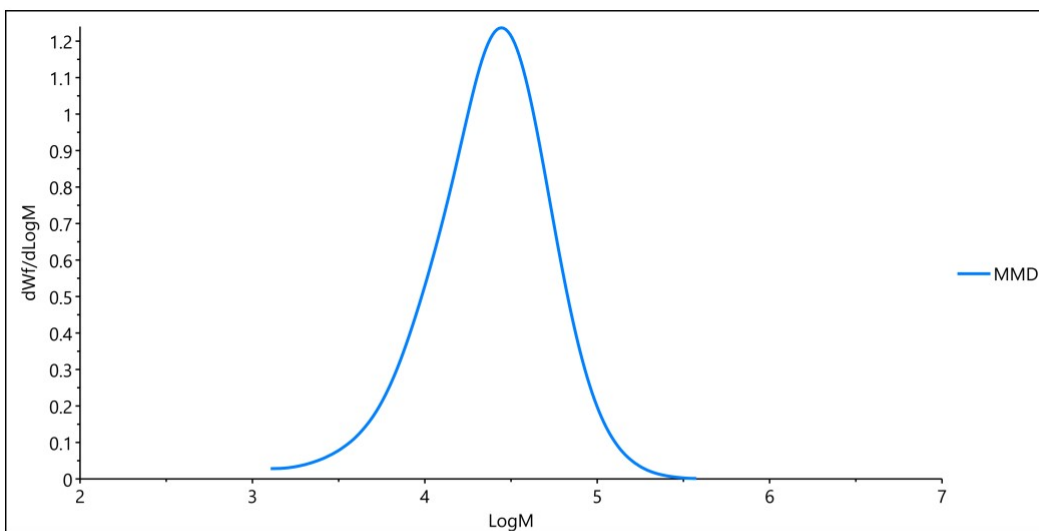

**Results**

|         |       |       |
|---------|-------|-------|
| Mw      | 32178 | g/mol |
| Mn      | 16259 | g/mol |
| Mw / Mn | 1.98  |       |
| Mz      | 55137 | g/mol |
| Mp      | 27813 | g/mol |
| Mv      | 29745 | g/mol |
| IVmwd   | 0.77  | dL/g  |

**Figure S45.** GPC trace of poly(*E-co*-2-methoxy allylbenzene) (Table 1, Entry 6).

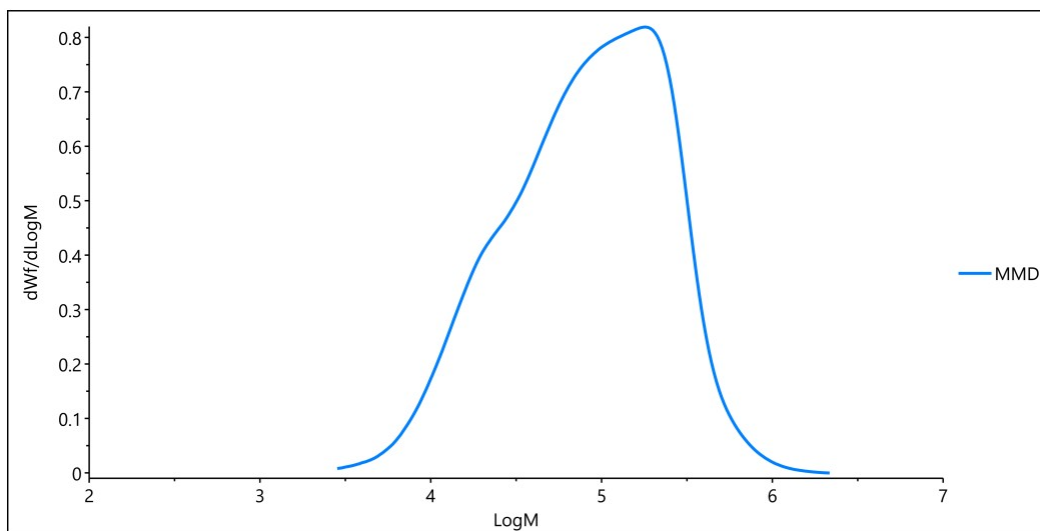

**Results**

|         |        |       |
|---------|--------|-------|
| Mw      | 131290 | g/mol |
| Mn      | 44139  | g/mol |
| Mw / Mn | 2.97   |       |
| Mz      | 272255 | g/mol |
| Mp      | 178317 | g/mol |
| Mv      | 116429 | g/mol |
| IVmwd   | 2.08   | dL/g  |

**Figure S46.** GPC trace of poly(*E-co*-2-allylphenol) after acetylation (Table 2, Entry 1).

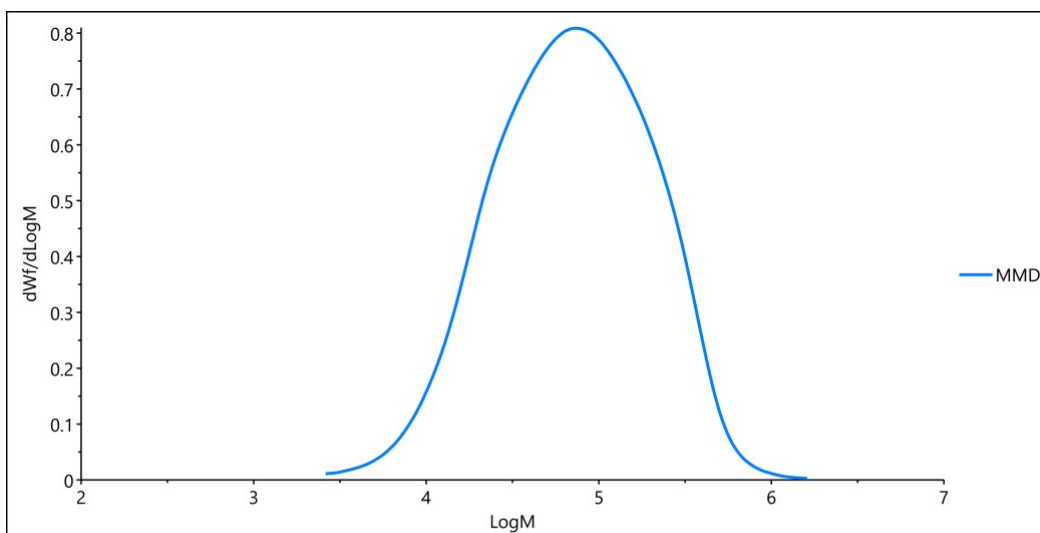

**Results**

|         |        |       |
|---------|--------|-------|
| Mw      | 113312 | g/mol |
| Mn      | 40654  | g/mol |
| Mw / Mn | 2.79   |       |
| Mz      | 245022 | g/mol |
| Mp      | 73900  | g/mol |
| Mv      | 100090 | g/mol |
| IVmwd   | 1.86   | dL/g  |

**Figure S47.** GPC trace of poly(*E-co*-2-allylphenol) after acetylation (Table 2, Entry 3).

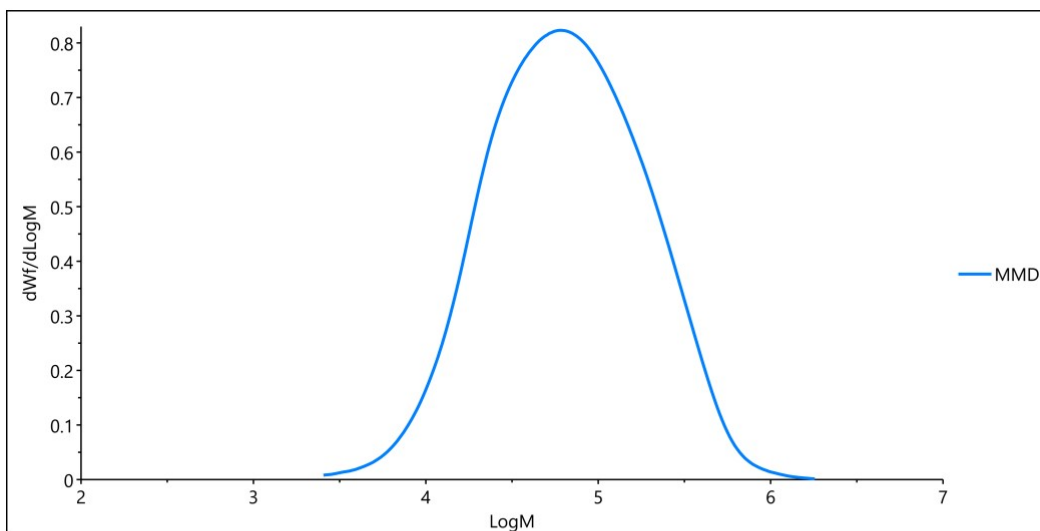

**Results**

|         |        |       |
|---------|--------|-------|
| Mw      | 107128 | g/mol |
| Mn      | 38895  | g/mol |
| Mw / Mn | 2.75   |       |
| Mz      | 250610 | g/mol |
| Mp      | 60708  | g/mol |
| Mv      | 93879  | g/mol |
| IVmwd   | 1.78   | dL/g  |

**Figure S48.** GPC trace of poly(*E-co*-2-allylphenol) after acetylation (Table 2, Entry 4).

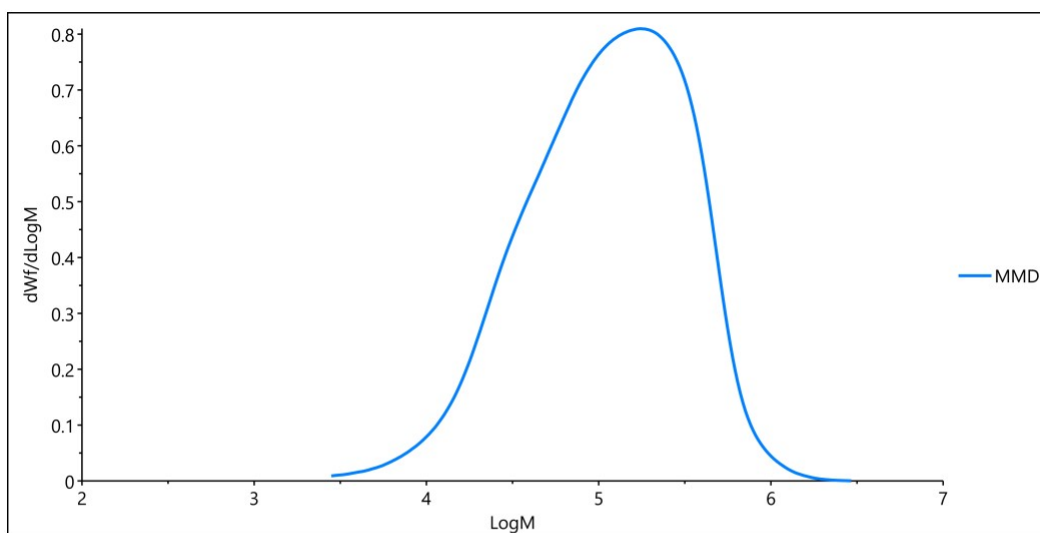

**Results**

|         |        |       |
|---------|--------|-------|
| Mw      | 177005 | g/mol |
| Mn      | 59363  | g/mol |
| Mw / Mn | 2.98   |       |
| Mz      | 360636 | g/mol |
| Mp      | 175753 | g/mol |
| Mv      | 157389 | g/mol |
| IVmwd   | 2.59   | dL/g  |

**Figure S49.** GPC trace of poly(*E-co*-2-allylphenol) after acetylation (Table 2, Entry 5).

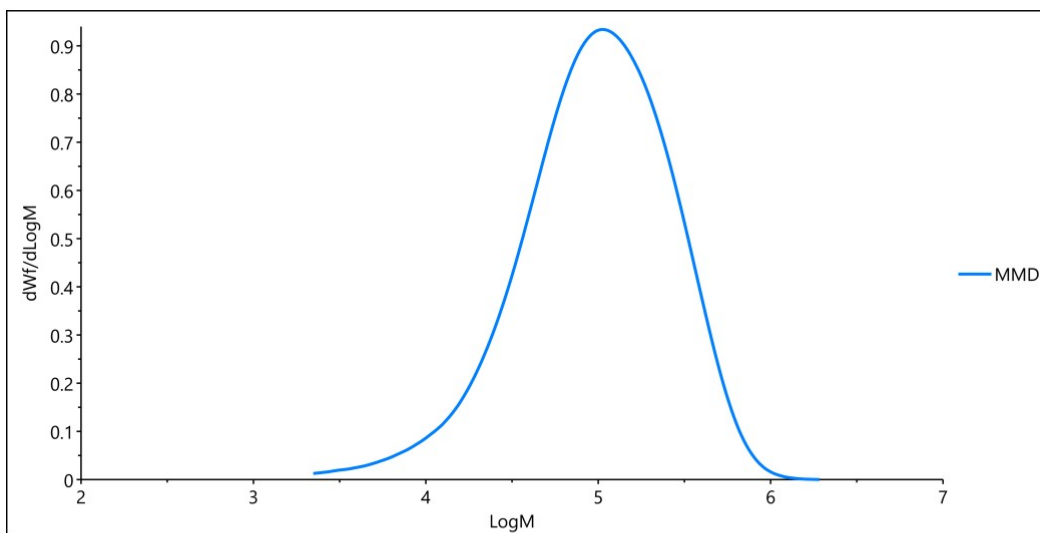

**Results**

|         |        |       |
|---------|--------|-------|
| Mw      | 145645 | g/mol |
| Mn      | 52585  | g/mol |
| Mw / Mn | 2.77   |       |
| Mz      | 279133 | g/mol |
| Mp      | 106193 | g/mol |
| Mv      | 131050 | g/mol |
| IVmwd   | 2.27   | dL/g  |

**Figure S50.** GPC trace of poly(*E-co-2-allylphenol*) (Table 2, Entry 6).

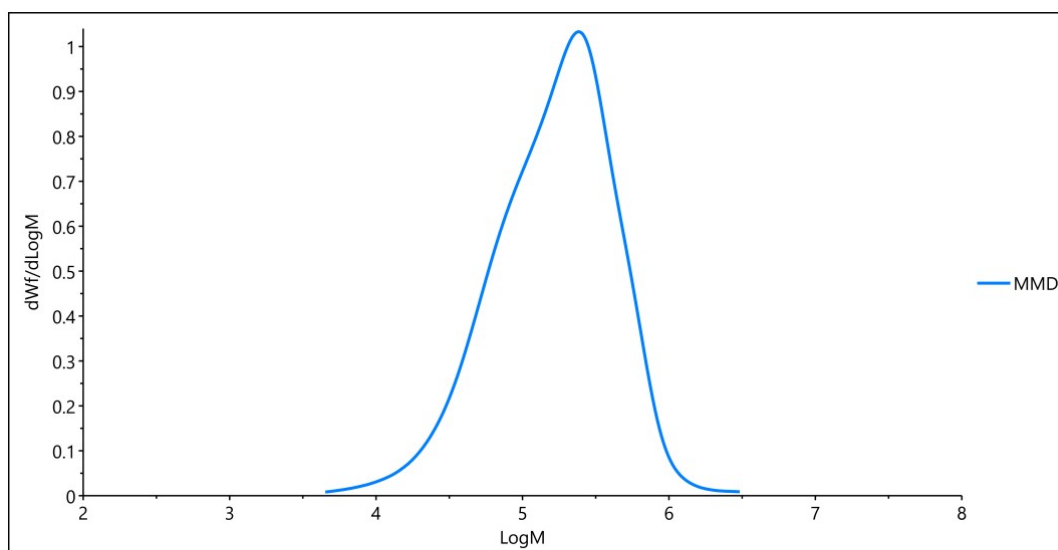

**Results**

|         |        |       |
|---------|--------|-------|
| Mw      | 240410 | g/mol |
| Mn      | 96471  | g/mol |
| Mw / Mn | 2.49   |       |
| Mz      | 468651 | g/mol |
| Mp      | 241216 | g/mol |
| Mv      | 214861 | g/mol |
| IVmwd   | 2.4783 | dL/g  |

**Figure S51.** GPC trace of poly(*E-co-2-allylphenol*) after acetylation (Table 2, Entry 7).

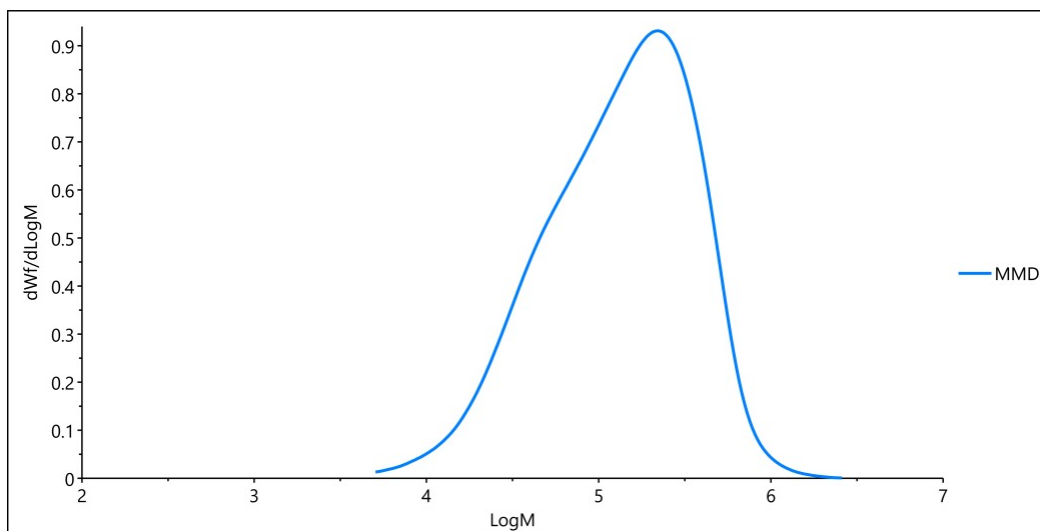

**Results**

|         |        |       |
|---------|--------|-------|
| Mw      | 196385 | g/mol |
| Mn      | 75764  | g/mol |
| Mw / Mn | 2.59   |       |
| Mz      | 365272 | g/mol |
| Mp      | 219613 | g/mol |
| Mv      | 177341 | g/mol |
| IVmwd   | 2.82   | dL/g  |

**Figure S52.** GPC trace of poly(E-co-2-allylphenol) (Table 2, Entry 8).

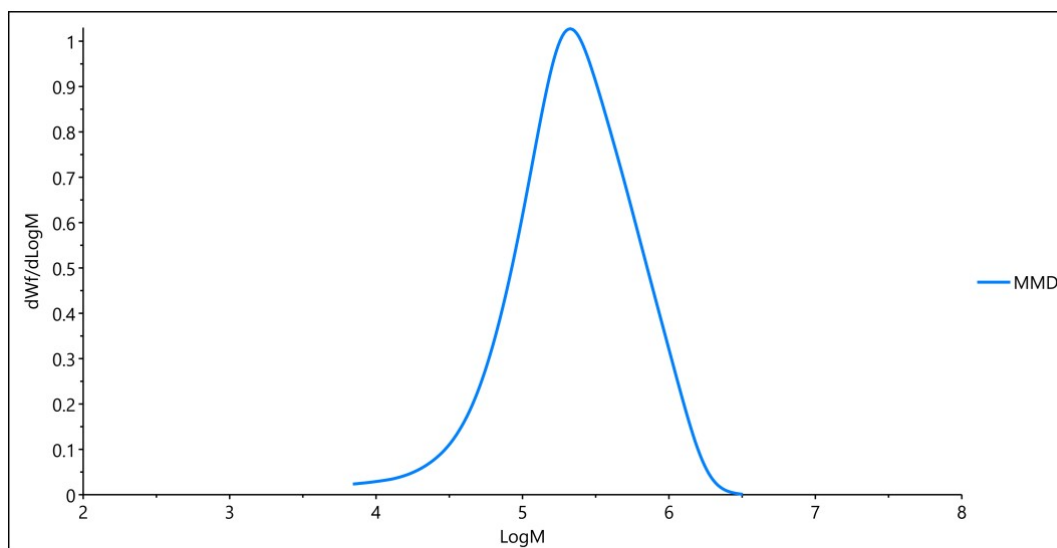

**Results**

|         |        |       |
|---------|--------|-------|
| Mw      | 332576 | g/mol |
| Mn      | 130017 | g/mol |
| Mw / Mn | 2.56   |       |
| Mz      | 638402 | g/mol |
| Mp      | 212026 | g/mol |
| Mv      | 296110 | g/mol |
| IVmwd   | 3.0952 | dL/g  |

**Figure S53.** GPC trace of poly(E-co-2-allylphenol) (Table 2, Entry 9).

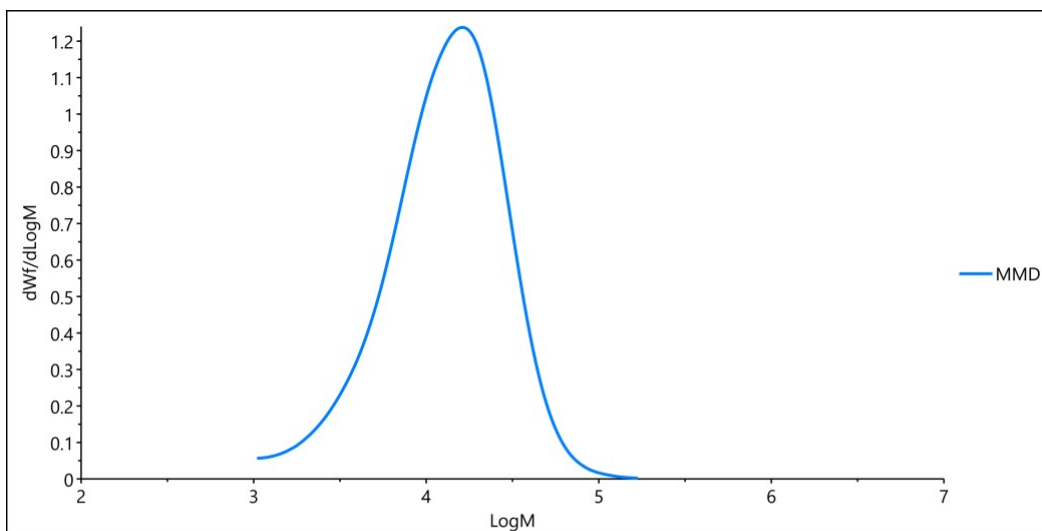

**Results**

|         |       |       |
|---------|-------|-------|
| Mw      | 16815 | g/mol |
| Mn      | 9052  | g/mol |
| Mw / Mn | 1.86  |       |
| Mz      | 27032 | g/mol |
| Mp      | 16178 | g/mol |
| Mv      | 15665 | g/mol |
| IVmwd   | 0.49  | dL/g  |

**Figure S54.** GPC trace of poly(E-co-2-allylphenoxy triisopropylsilane) (Table 2, Entry 12).

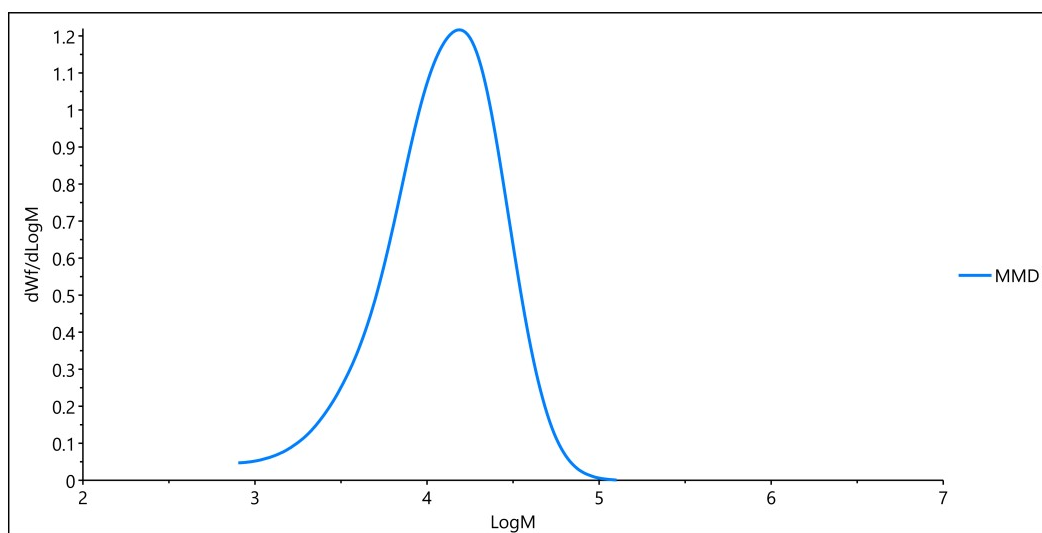

**Results**

|         |       |       |
|---------|-------|-------|
| Mw      | 15830 | g/mol |
| Mn      | 8265  | g/mol |
| Mw / Mn | 1.92  |       |
| Mz      | 24628 | g/mol |
| Mp      | 15362 | g/mol |
| Mv      | 14767 | g/mol |
| IVmwd   | 0.47  | dL/g  |

**Figure S55.** GPC trace of poly(E-co-2-allylphenoxy triisopropylsilane) (Table 2, Entry 13).

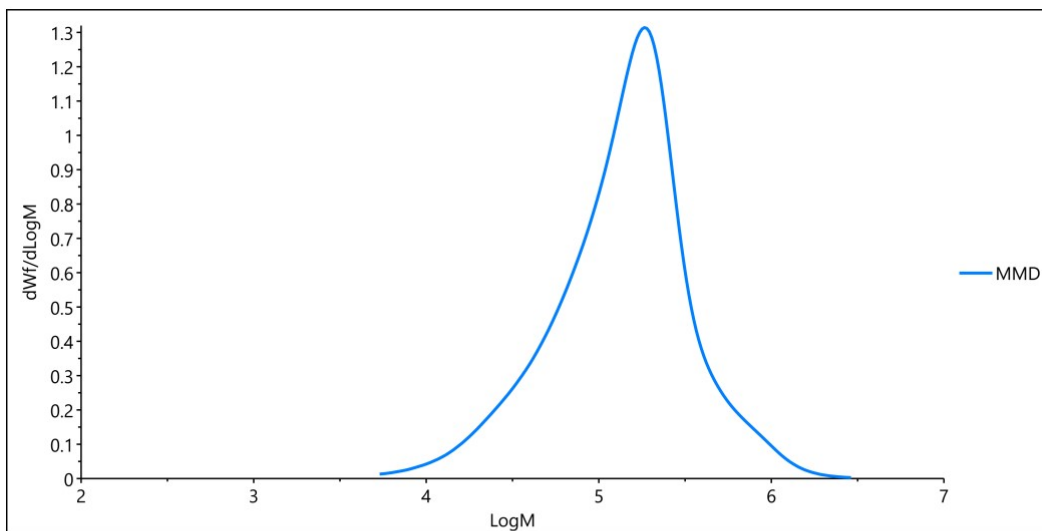

**Results**

|         |        |       |
|---------|--------|-------|
| Mw      | 200015 | g/mol |
| Mn      | 84121  | g/mol |
| Mw / Mn | 2.38   |       |
| Mz      | 422711 | g/mol |
| Mp      | 184207 | g/mol |
| Mv      | 180250 | g/mol |
| IVmwd   | 2.85   | dL/g  |

**Figure S56.** GPC trace of poly(*E-co*-2-allylphenol) after acetylation (Table 3, Entry 1).

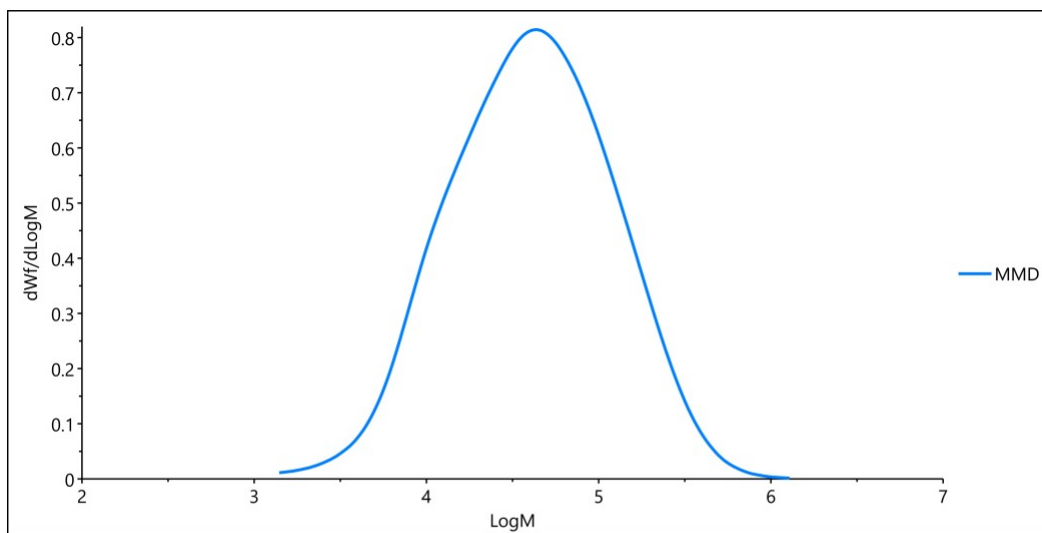

**Results**

|         |        |       |
|---------|--------|-------|
| Mw      | 69615  | g/mol |
| Mn      | 22755  | g/mol |
| Mw / Mn | 3.06   |       |
| Mz      | 173930 | g/mol |
| Mp      | 43320  | g/mol |
| Mv      | 60355  | g/mol |
| IVmwd   | 1.29   | dL/g  |

**Figure S57.** GPC trace of poly(*E-co*-2-allylphenol) after acetylation (Table 3, Entry 3).

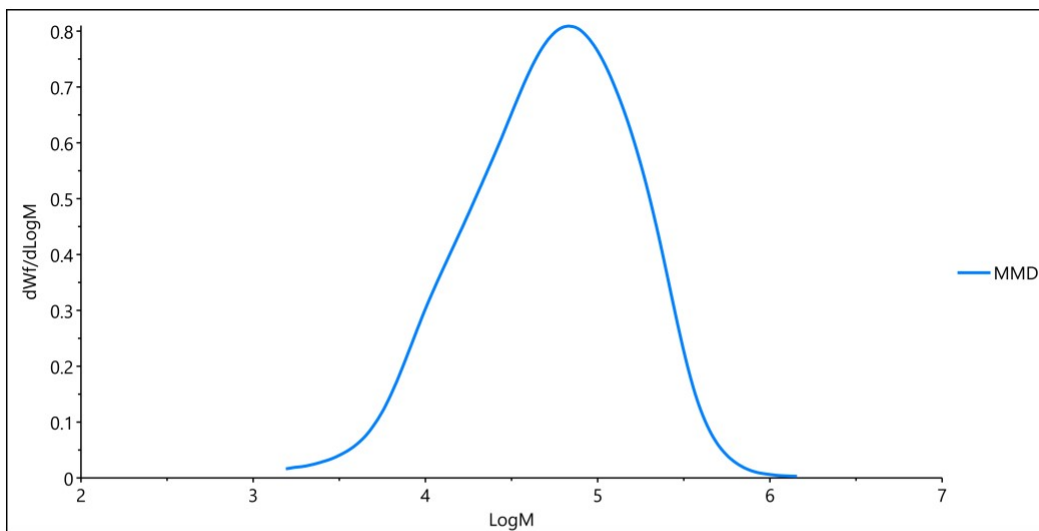

**Results**

|         |        |       |
|---------|--------|-------|
| Mw      | 88817  | g/mol |
| Mn      | 27528  | g/mol |
| Mw / Mn | 3.23   |       |
| Mz      | 200528 | g/mol |
| Mp      | 68186  | g/mol |
| Mv      | 77868  | g/mol |
| IVmwd   | 1.55   | dL/g  |

**Figure S58.** GPC trace of poly(*E-co-2-allylphenol*) after acetylation (Table 3, Entry 4).

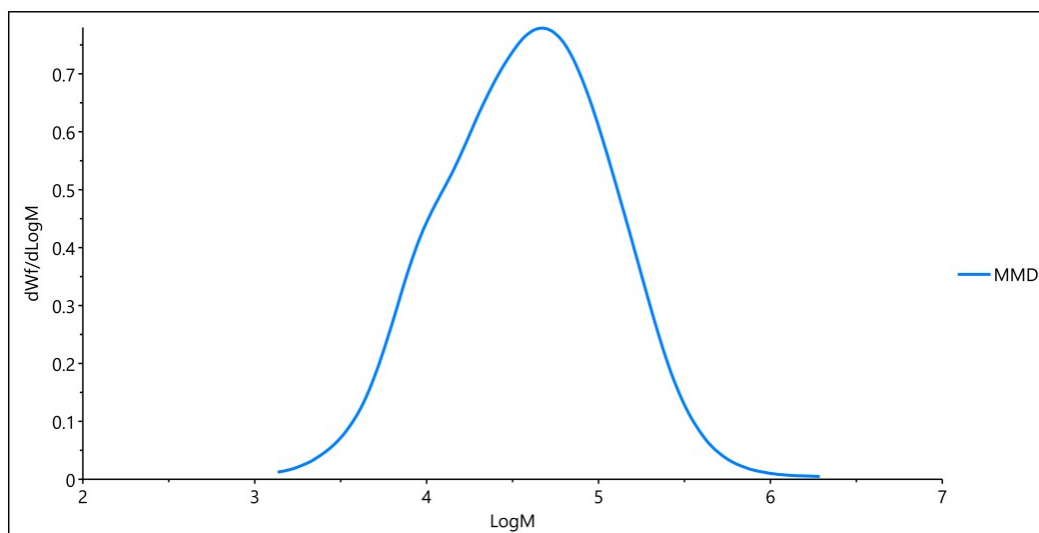

**Results**

|         |        |       |
|---------|--------|-------|
| Mw      | 70836  | g/mol |
| Mn      | 20271  | g/mol |
| Mw / Mn | 3.49   |       |
| Mz      | 229856 | g/mol |
| Mp      | 46941  | g/mol |
| Mv      | 59945  | g/mol |
| IVmwd   | 1.28   | dL/g  |

**Figure S59.** GPC trace of poly(*E-co-2-allylphenol*) after acetylation (Table 3, Entry 5).

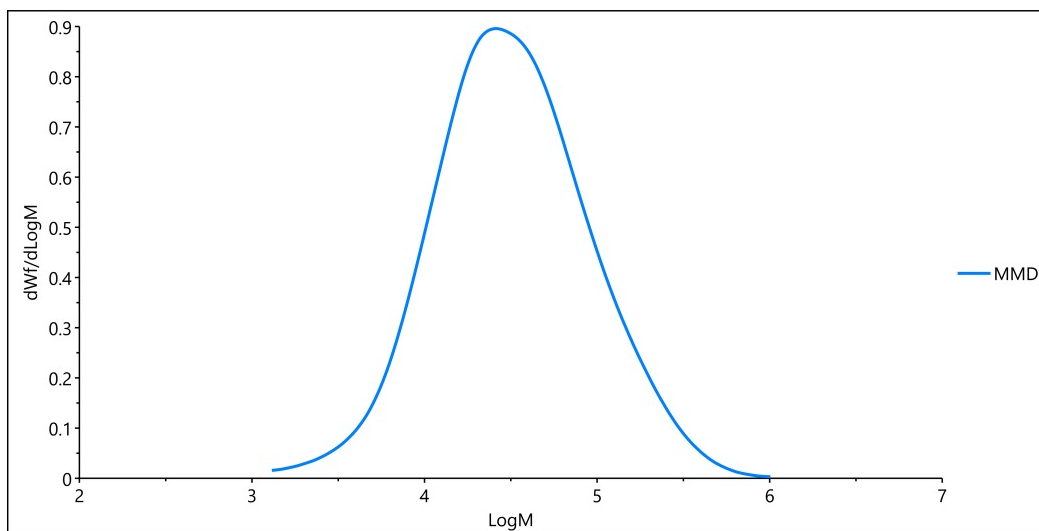

**Results**

|         |        |       |
|---------|--------|-------|
| Mw      | 54606  | g/mol |
| Mn      | 19124  | g/mol |
| Mw / Mn | 2.86   |       |
| Mz      | 148611 | g/mol |
| Mp      | 26007  | g/mol |
| Mv      | 47139  | g/mol |
| IVmwd   | 1.08   | dL/g  |

**Figure S60.** GPC trace of poly(*E-co-2-allylphenol*) after acetylation (Table 3, Entry 6).

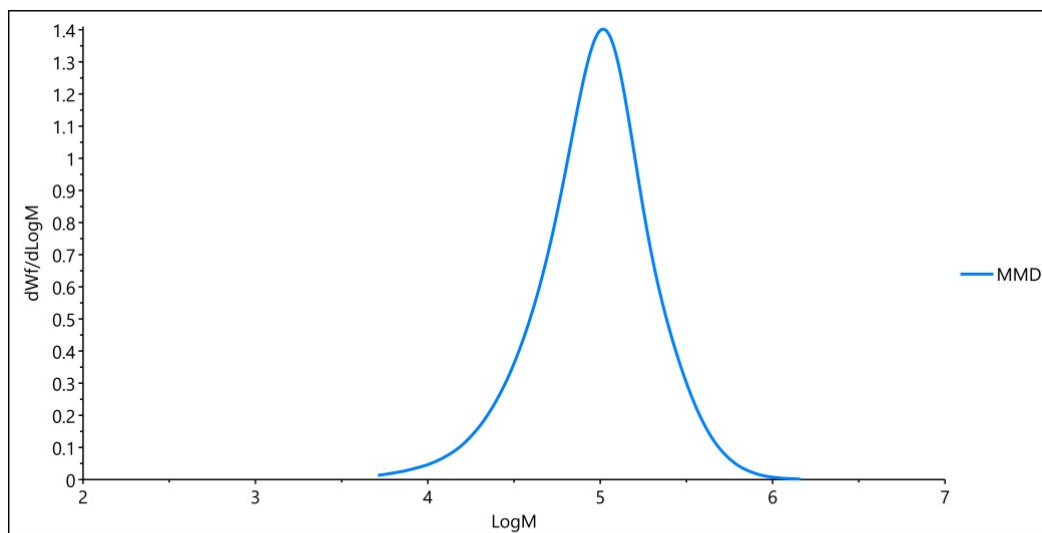

**Results**

|         |        |       |
|---------|--------|-------|
| Mw      | 122519 | g/mol |
| Mn      | 66317  | g/mol |
| Mw / Mn | 1.85   |       |
| Mz      | 208302 | g/mol |
| Mp      | 103908 | g/mol |
| Mv      | 113746 | g/mol |
| IVmwd   | 2.04   | dL/g  |

**Figure S61.** GPC trace of poly(*E-co-2-allylphenol*) after acetylation (Table 3, Entry 7).

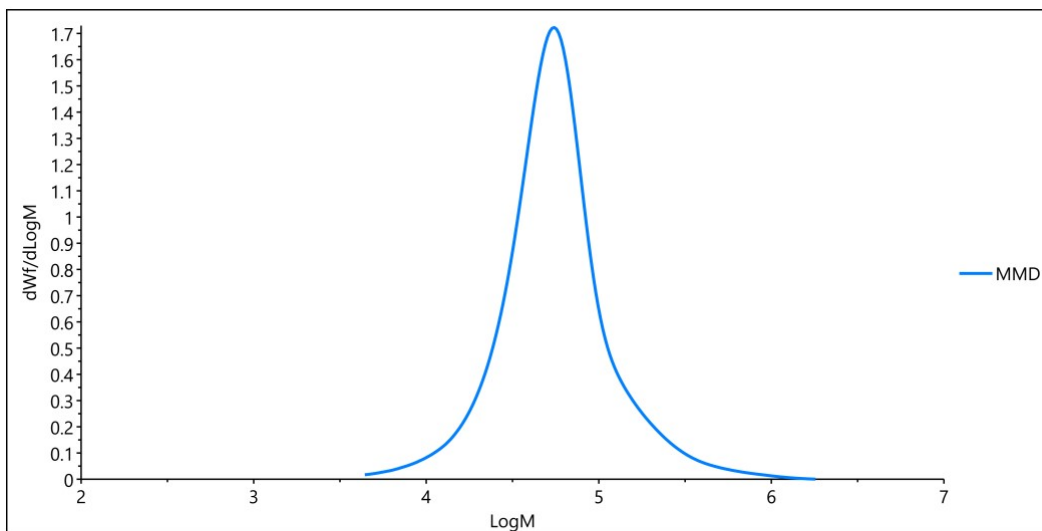

**Results**

|         |        |       |
|---------|--------|-------|
| Mw      | 76379  | g/mol |
| Mn      | 42774  | g/mol |
| Mw / Mn | 1.79   |       |
| Mz      | 187502 | g/mol |
| Mp      | 54890  | g/mol |
| Mv      | 69237  | g/mol |
| IVmwd   | 1.43   | dL/g  |

**Figure S62.** GPC trace of poly(*E-co-2-allylphenol*) after acetylation (Table 3, Entry 8).

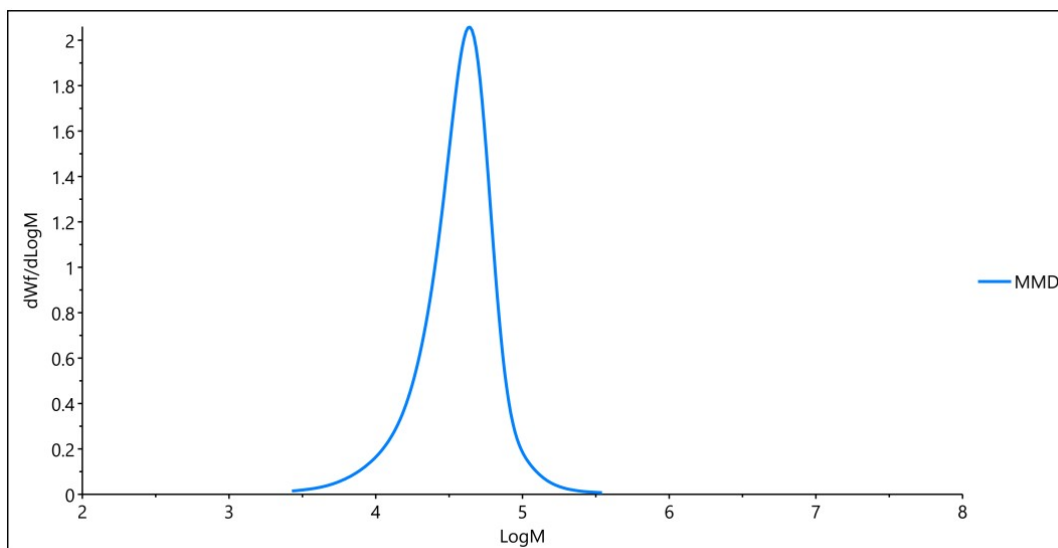

**Results**

|         |        |       |
|---------|--------|-------|
| Mw      | 42592  | g/mol |
| Mn      | 29326  | g/mol |
| Mw / Mn | 1.45   |       |
| Mz      | 58604  | g/mol |
| Mp      | 43351  | g/mol |
| Mv      | 40621  | g/mol |
| IVmwd   | 0.7813 | dL/g  |

**Figure S63.** GPC trace of poly(*E-co-2-allylphenol*) after acetylation (Table 3, Entry 9).

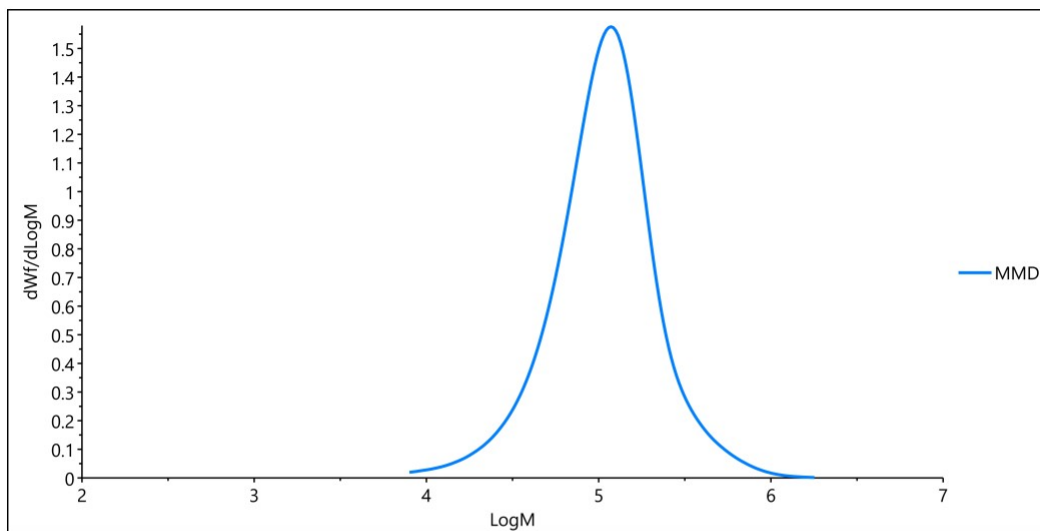

**Results**

|         |        |       |
|---------|--------|-------|
| Mw      | 136739 | g/mol |
| Mn      | 81514  | g/mol |
| Mw / Mn | 1.68   |       |
| Mz      | 234857 | g/mol |
| Mp      | 117752 | g/mol |
| Mv      | 127640 | g/mol |
| IVmwd   | 2.22   | dL/g  |

**Figure S64.** GPC trace of poly(*E-co-2*-allylphenol) after acetylation (Table 3, Entry 10).

**12. DSC Traces of Polymer Samples**

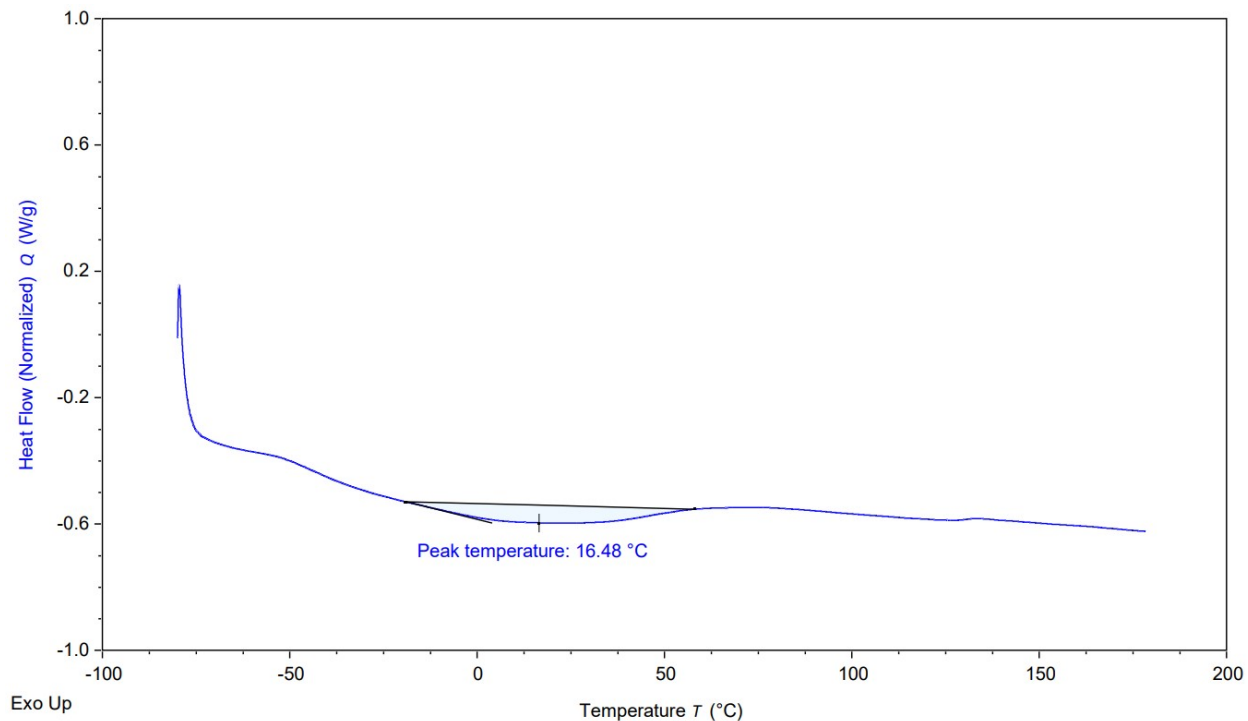

**Figure S65.** DSC trace of poly(*E-co-2*-allylphenol) (Table 1, Entry 3).

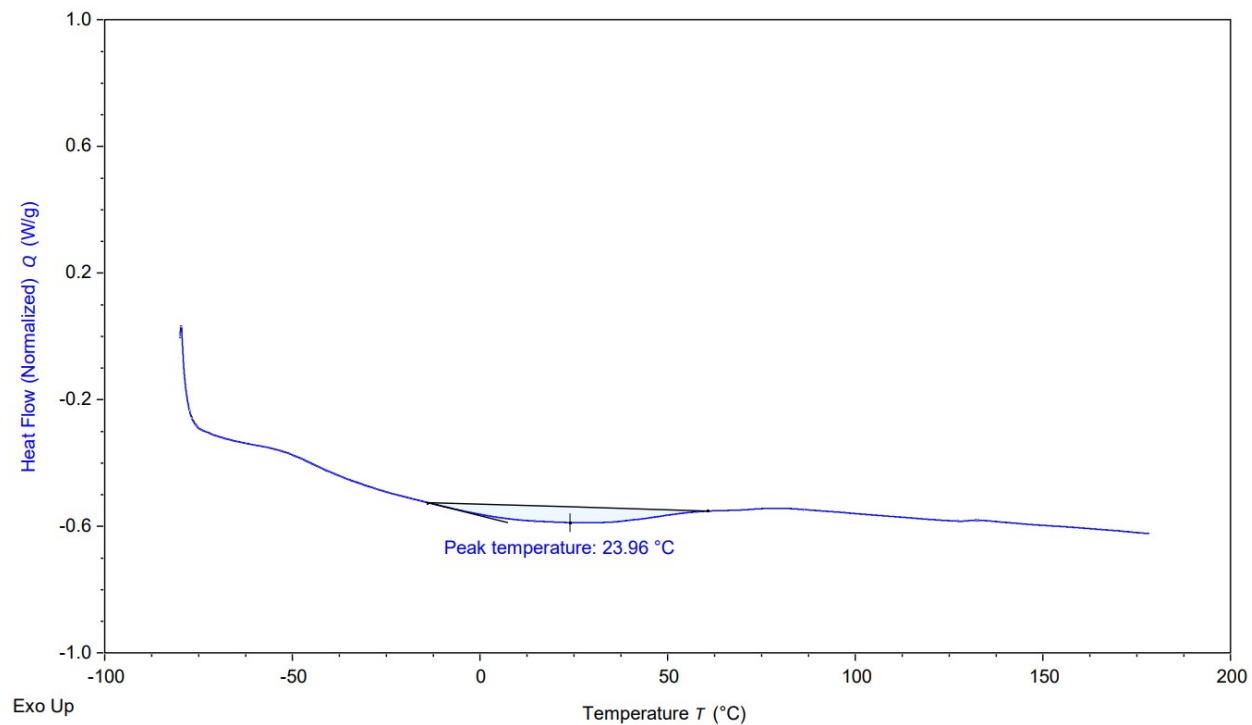

**Figure S66.** DSC trace of poly(E-co-2-allylphenol) (Table 2, Entry 1).

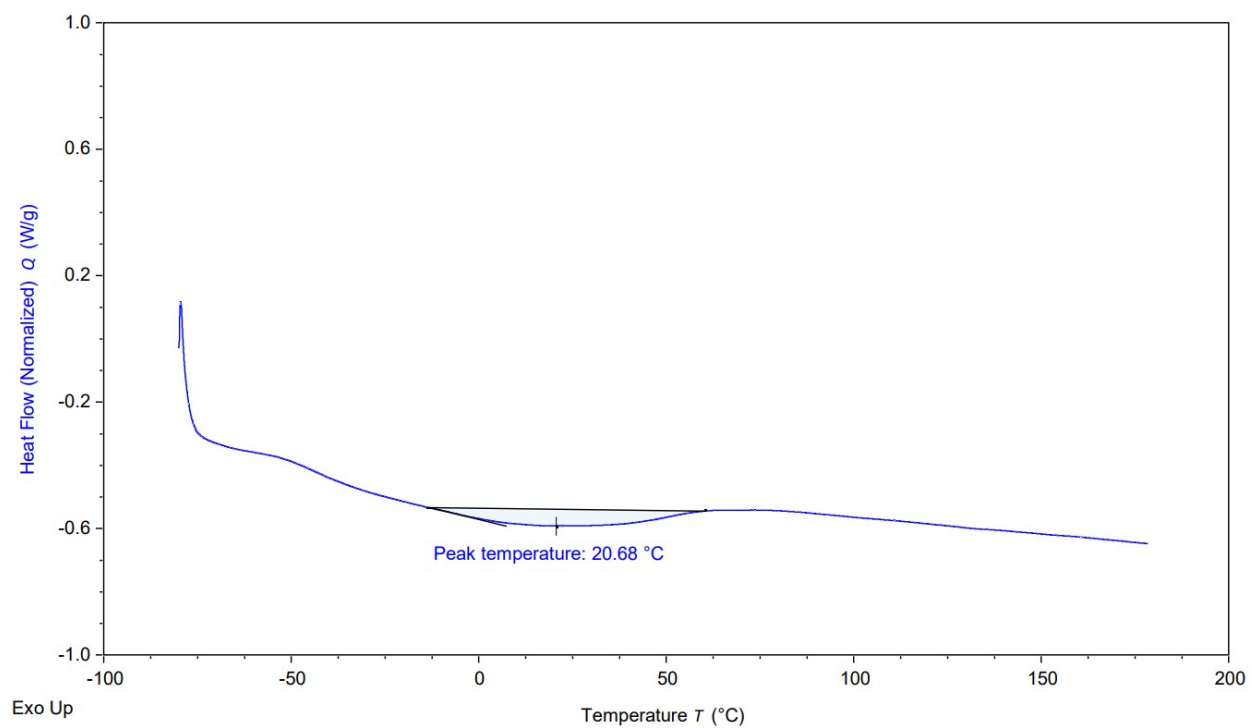

**Figure S67.** DSC trace of poly(E-co-2-allylphenol) (Table 2, Entry 3).

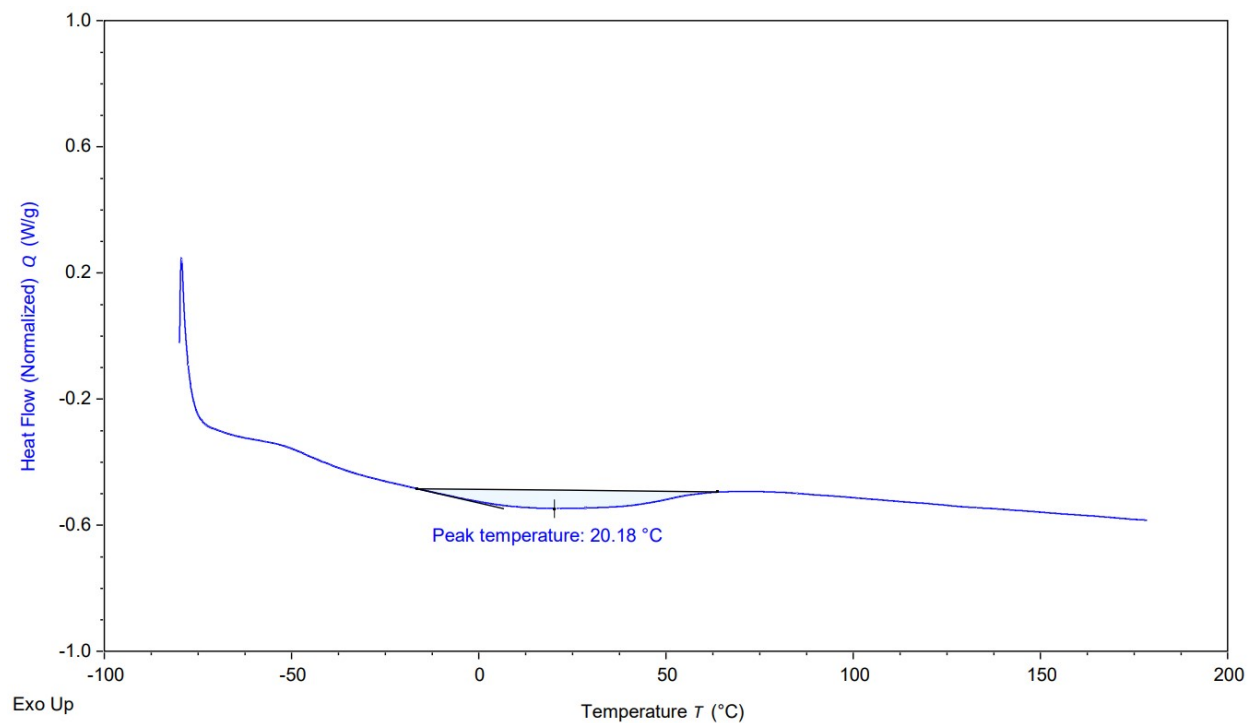

**Figure S68.** DSC trace of poly(E-co-2-allylphenol) (Table 2, Entry 4).

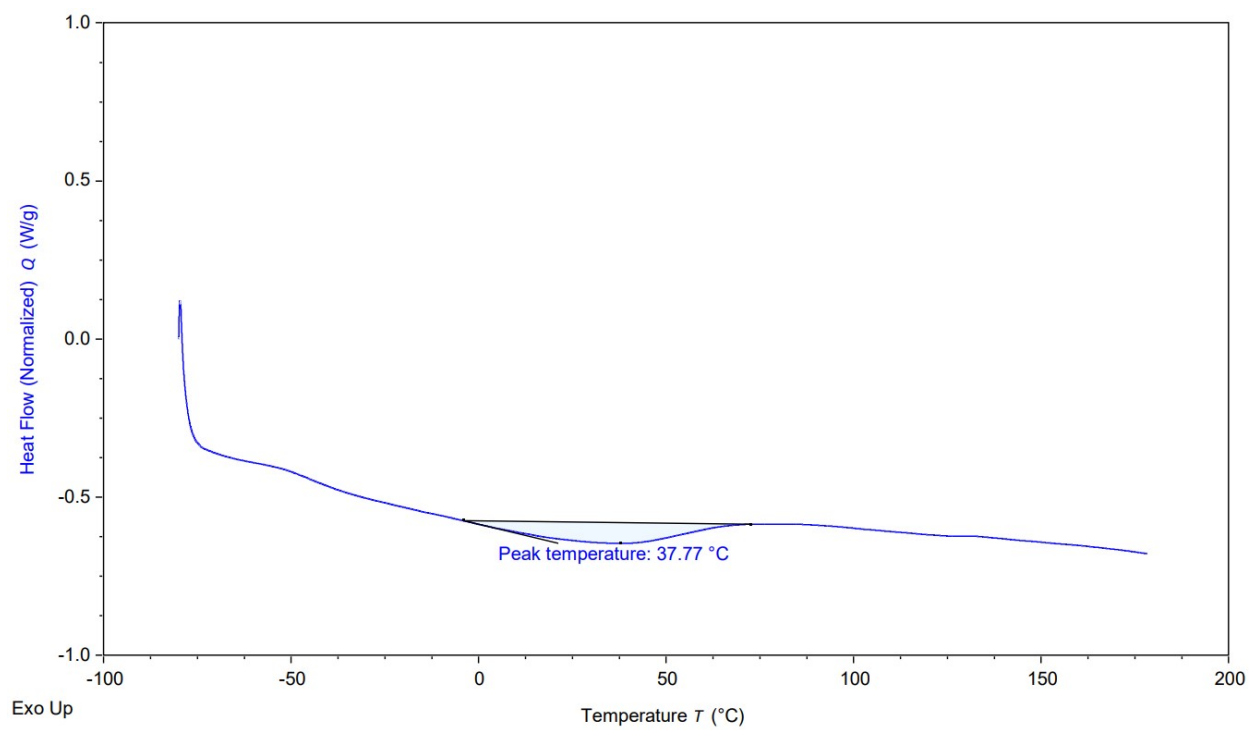

**Figure S69.** DSC trace of poly(E-co-2-allylphenol) (Table 2, Entry 5).

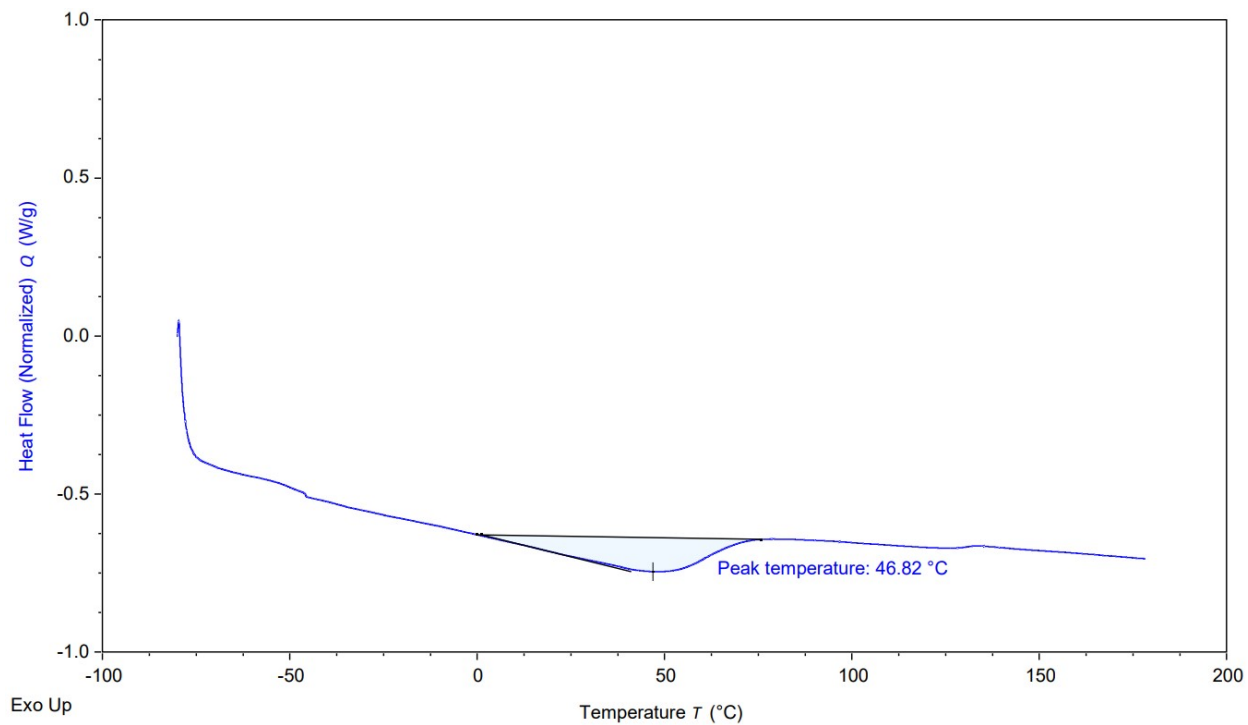

**Figure S70.** DSC trace of poly(E-co-2-allylphenol) (Table 2, Entry 6).

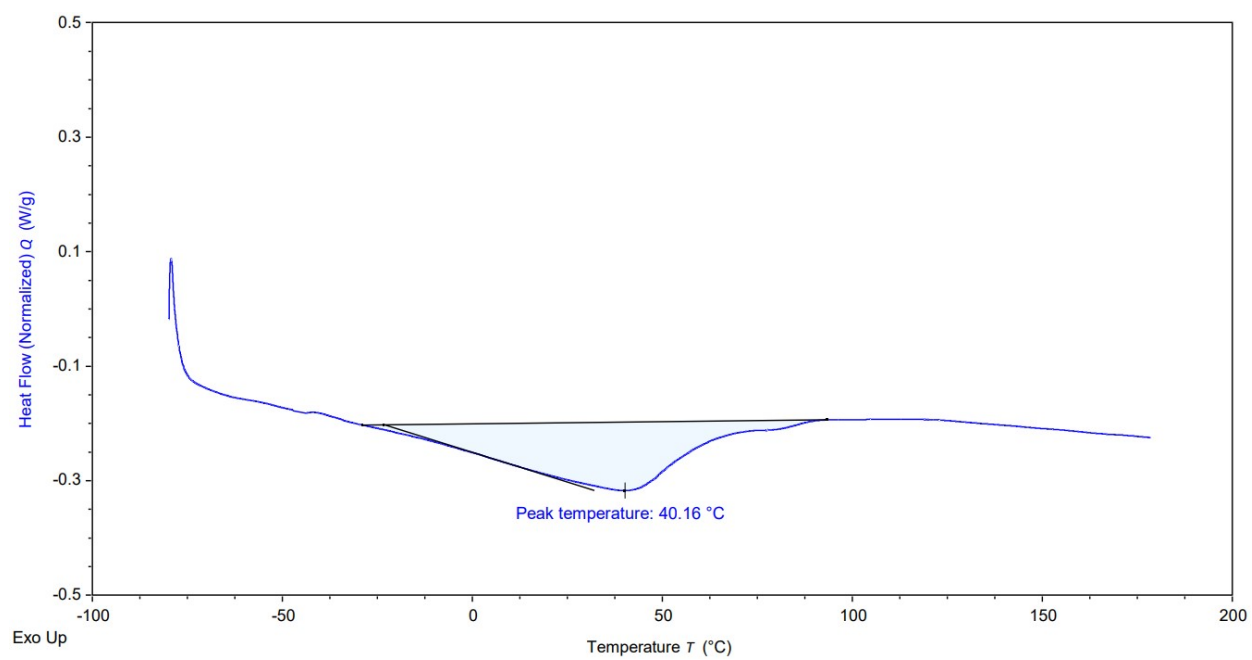

**Figure S71.** DSC trace of poly(E-co-2-allylphenol) (Table 2, Entry 7).

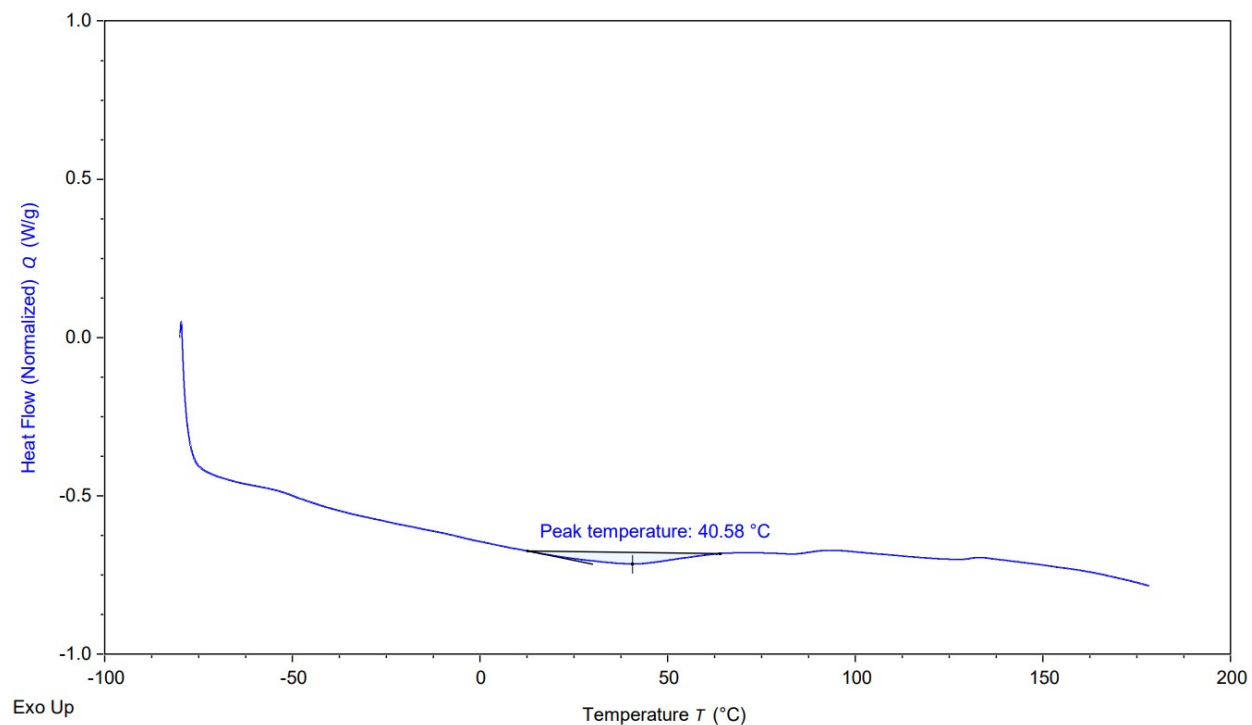

**Figure S72.** DSC trace of poly(E-co-2-allylphenol) (Table 2, Entry 8).

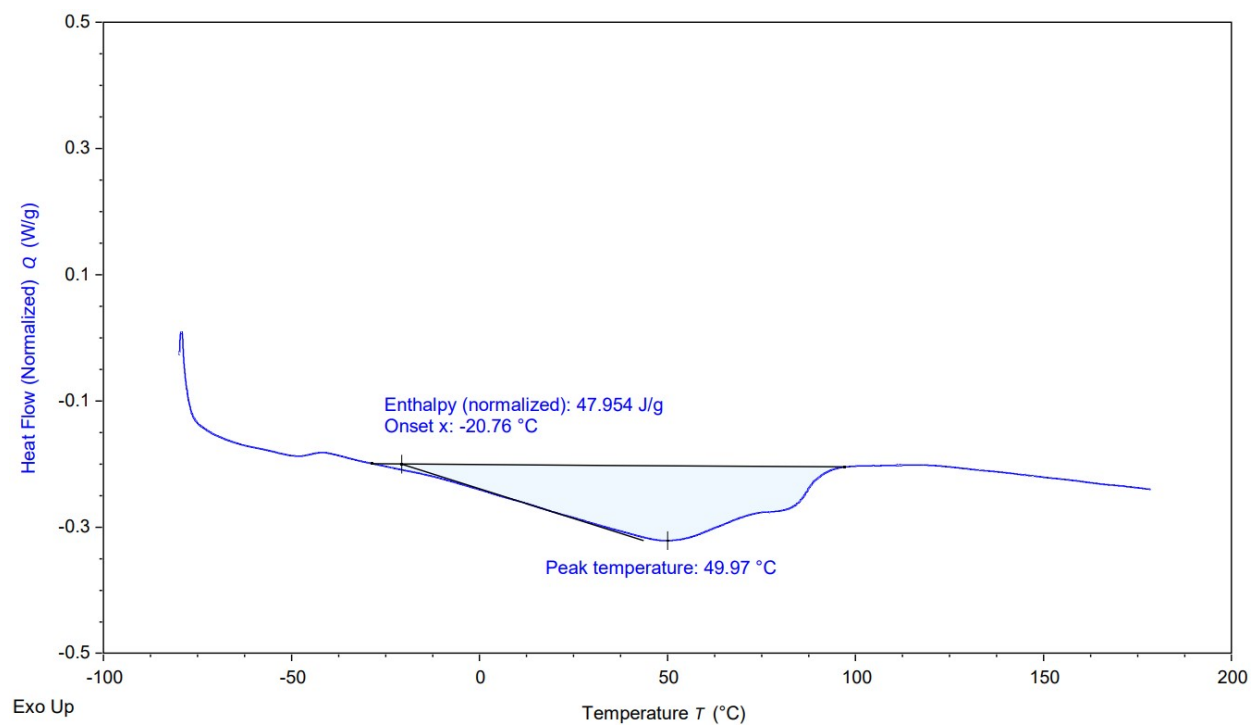

**Figure S73.** DSC trace of poly(E-co-2-allylphenol) (Table 2, Entry 9).

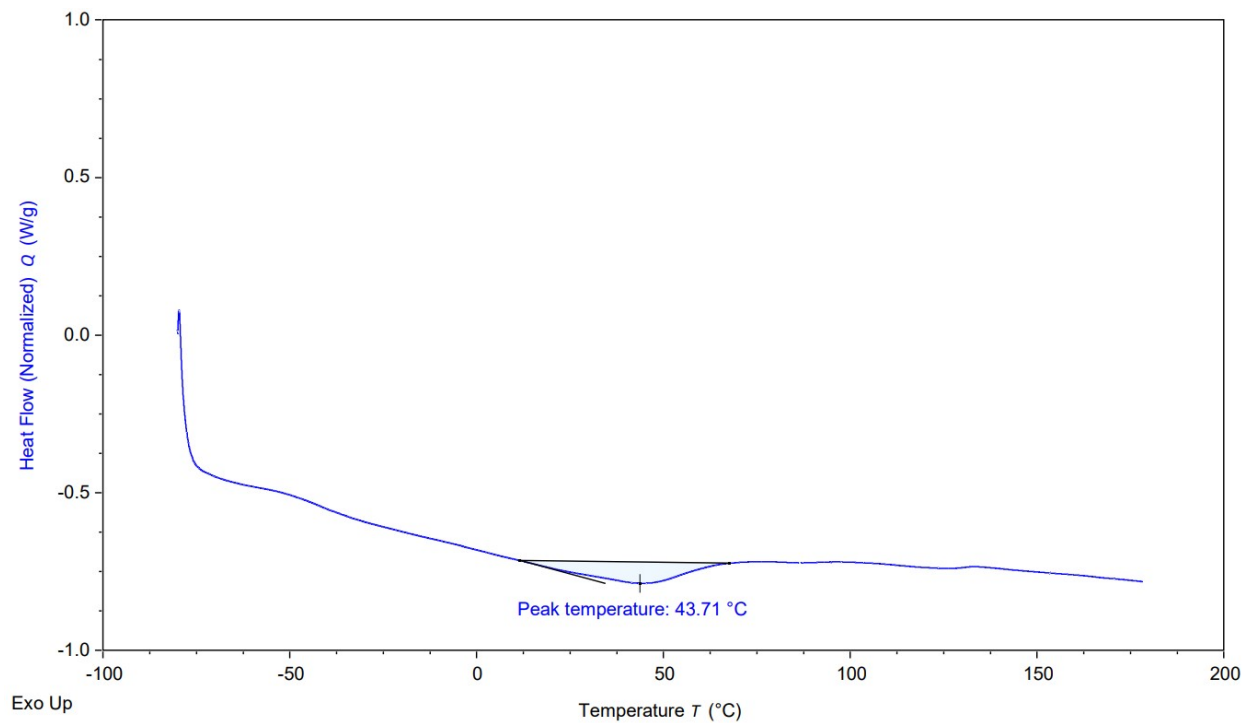

**Figure S74.** DSC trace of poly(E-co-2-allylphenol) (Table 3, Entry 1).

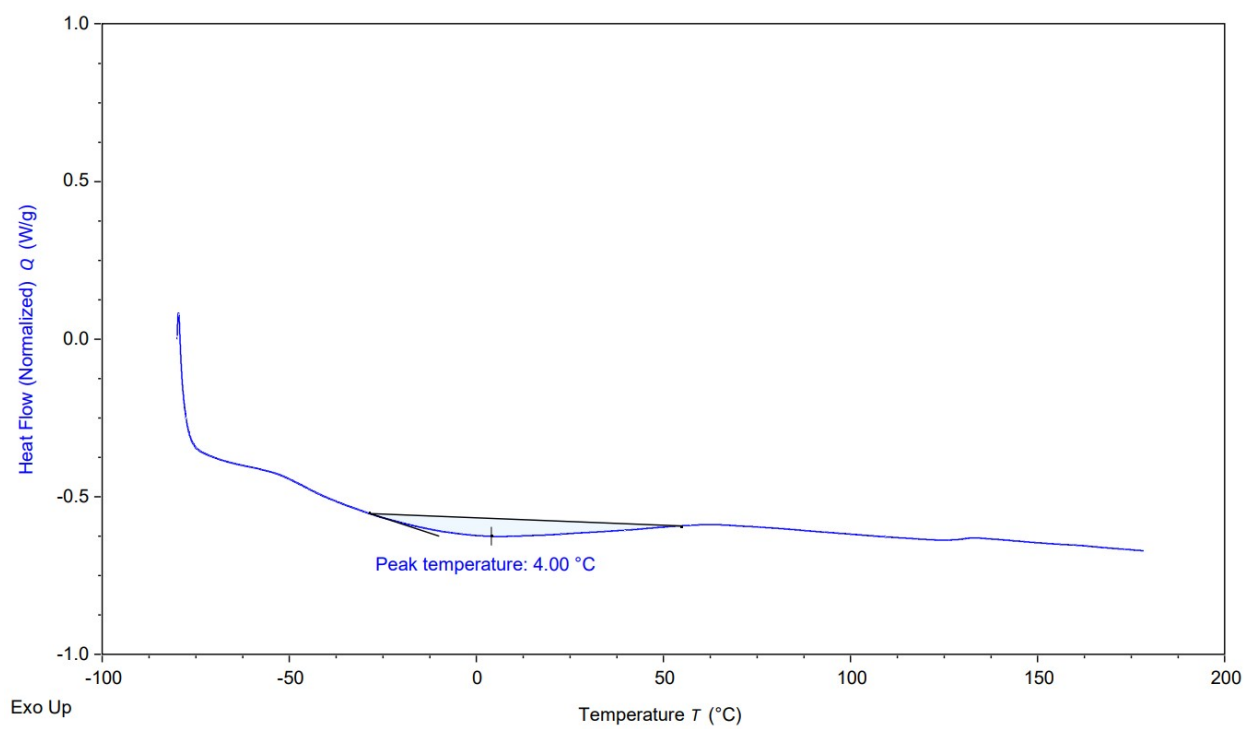

**Figure S75.** DSC trace of poly(E-co-2-allylphenol) (Table 3, Entry 3).

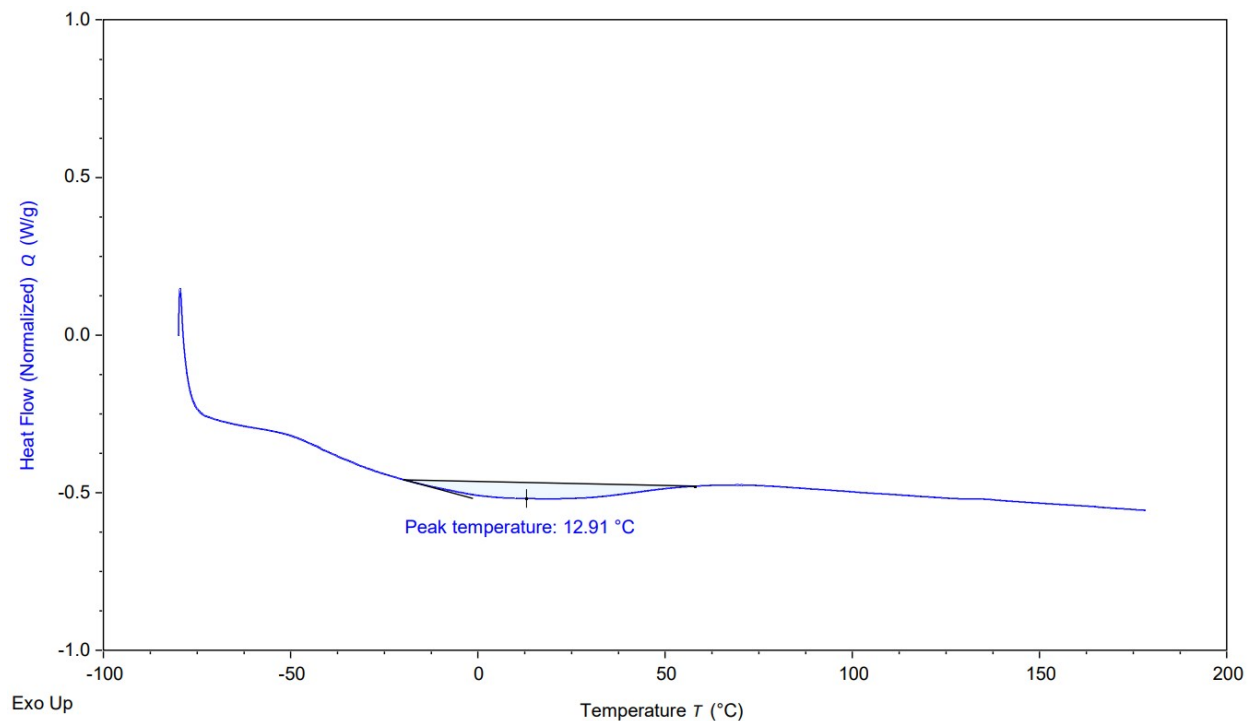

**Figure S76.** DSC trace of poly(E-co-2-allylphenol) (Table 3, Entry 4).

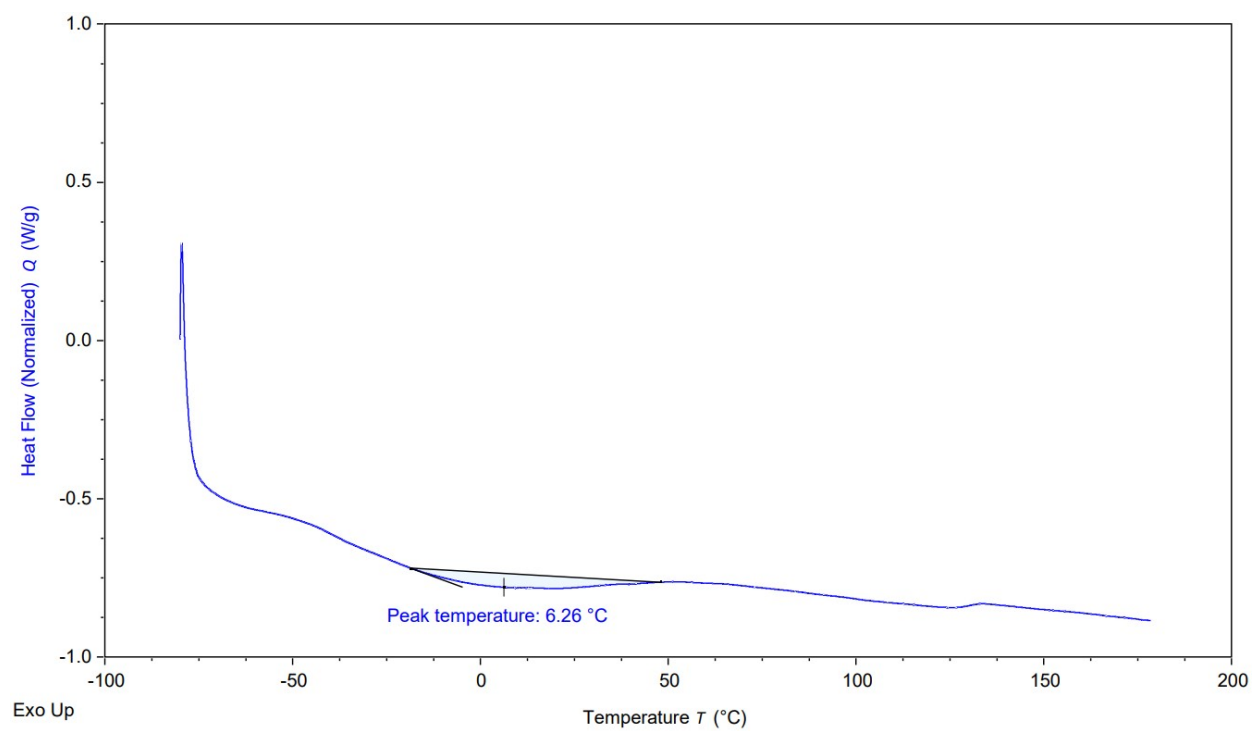

**Figure S77.** DSC trace of poly(E-co-2-allylphenol) (Table 3, Entry 5).

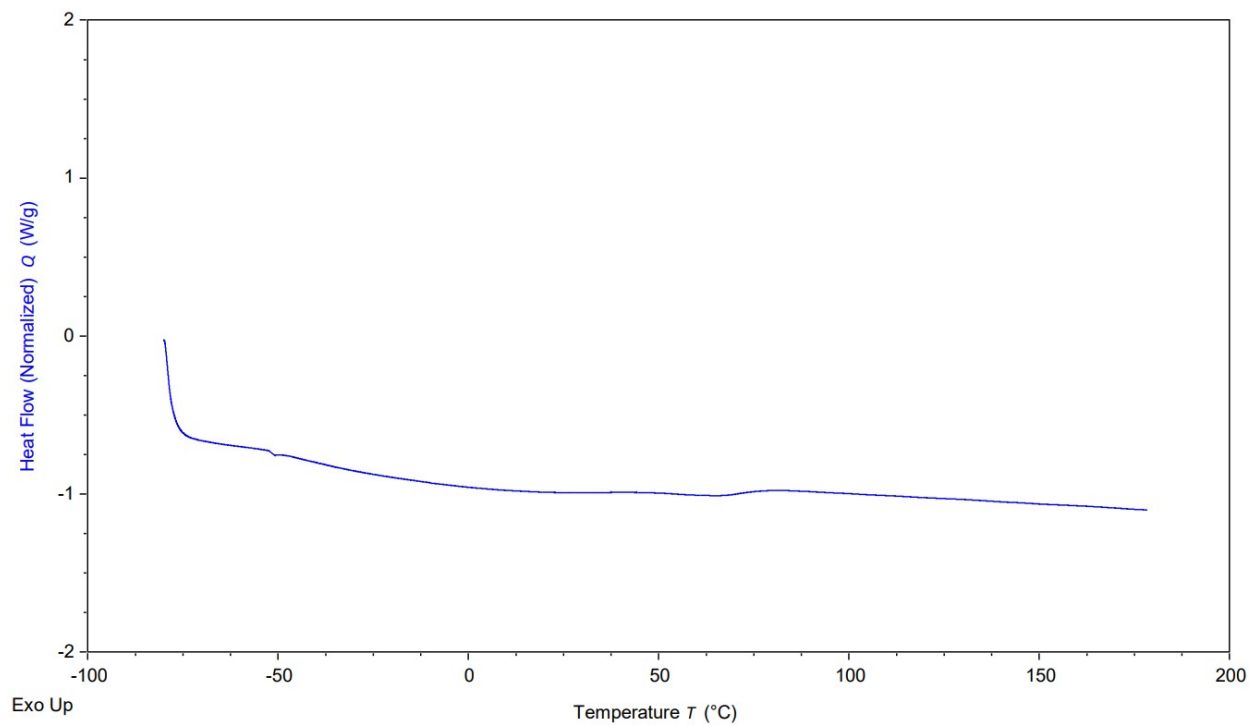

**Figure S78.** DSC trace of poly(E-co-2-allylphenol) (Table 3, Entry 6).

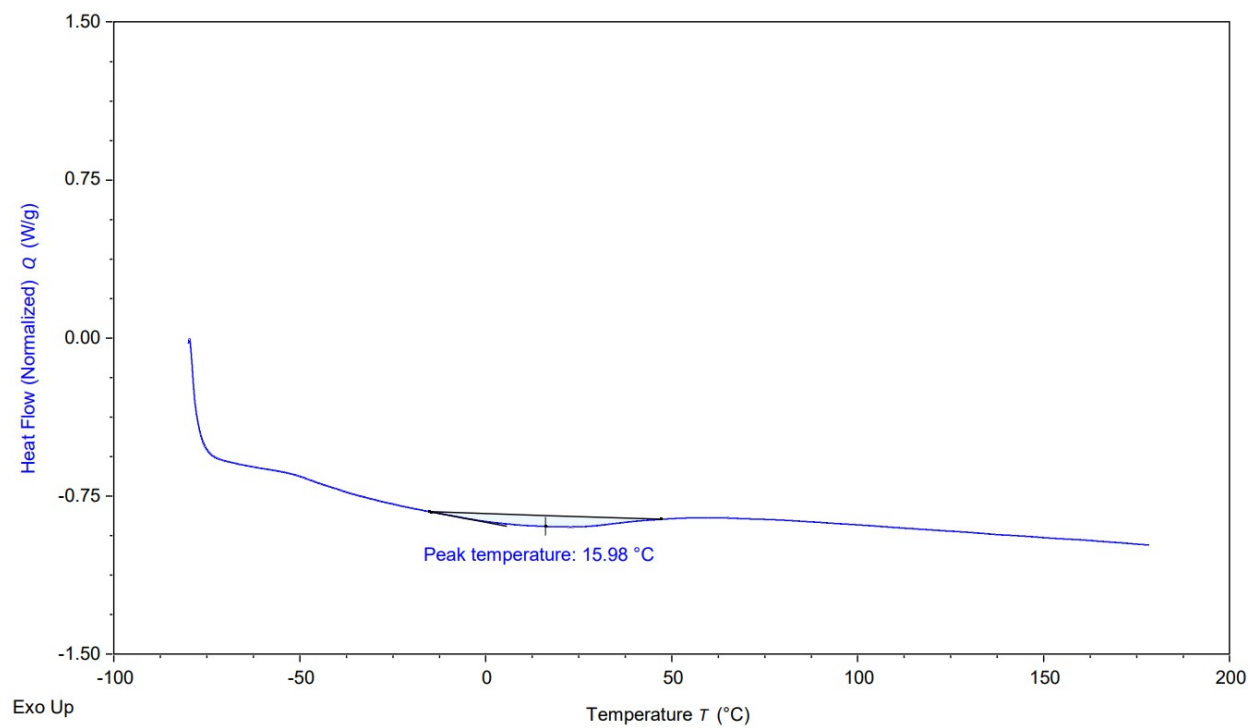

**Figure S79.** DSC trace of poly(E-co-2-allylphenol) (Table 3, Entry 7).

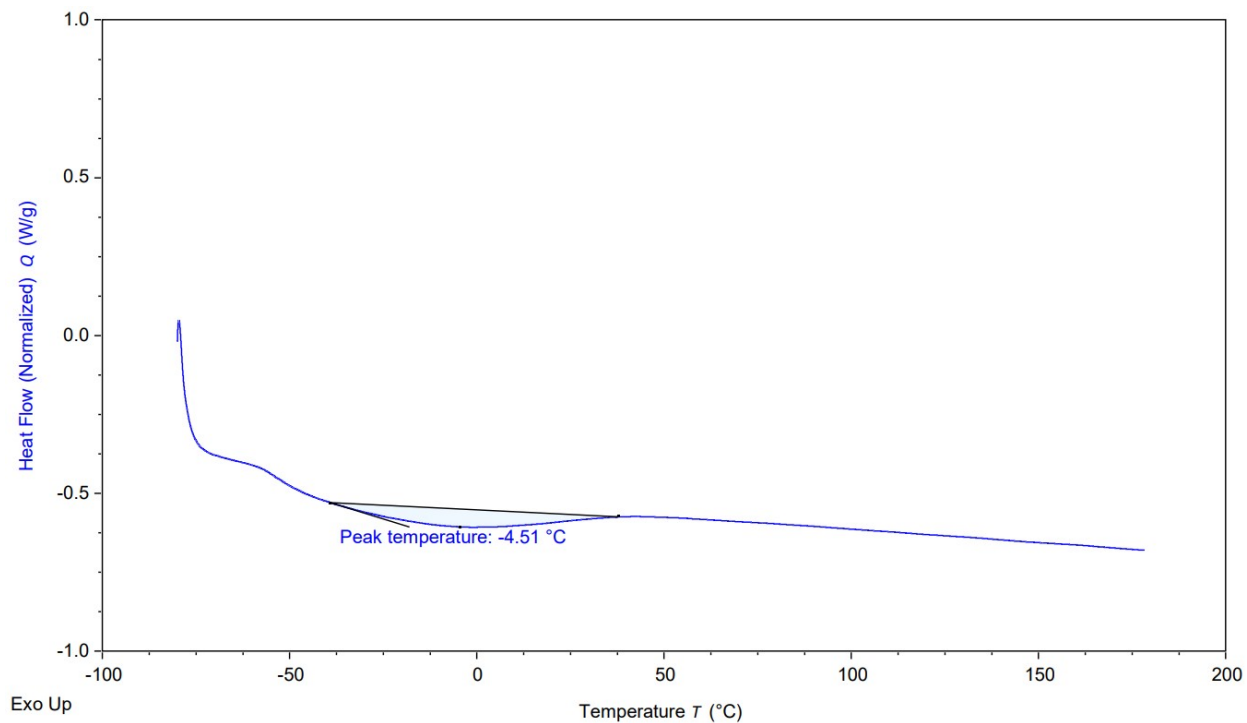

**Figure S80.** DSC trace of poly(E-co-2-allylphenol) (Table 3, Entry 8).

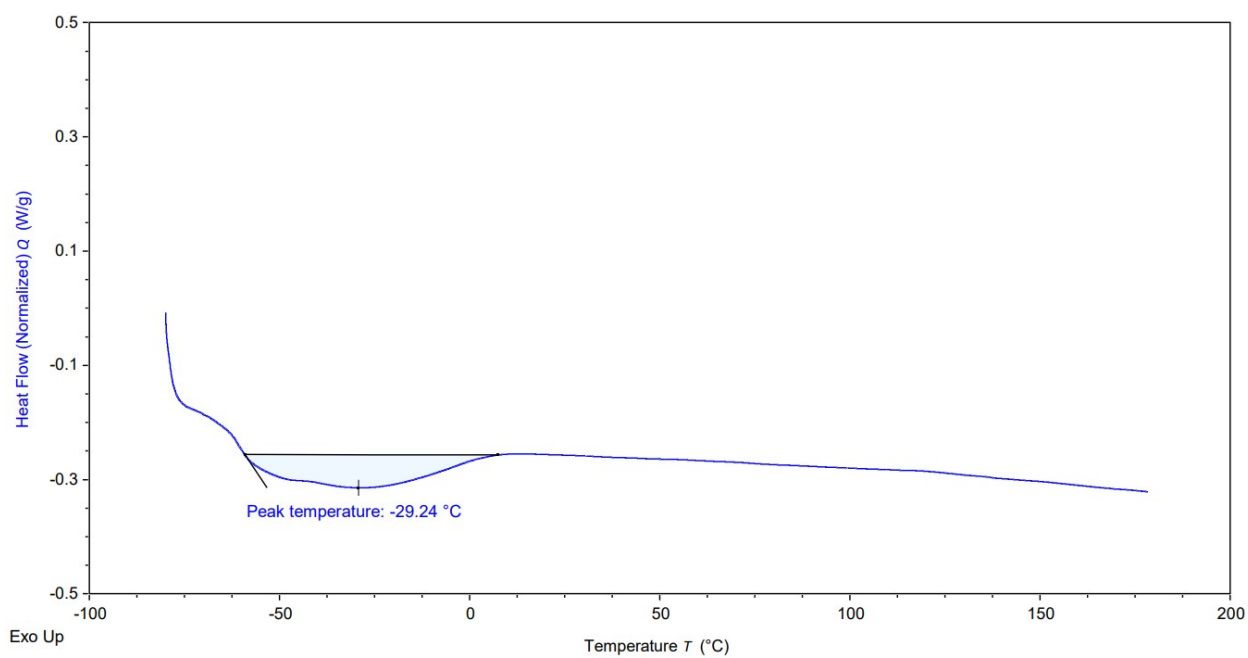

**Figure S81.** DSC trace of poly(E-co-2-allylphenol) (Table 3, Entry 9).

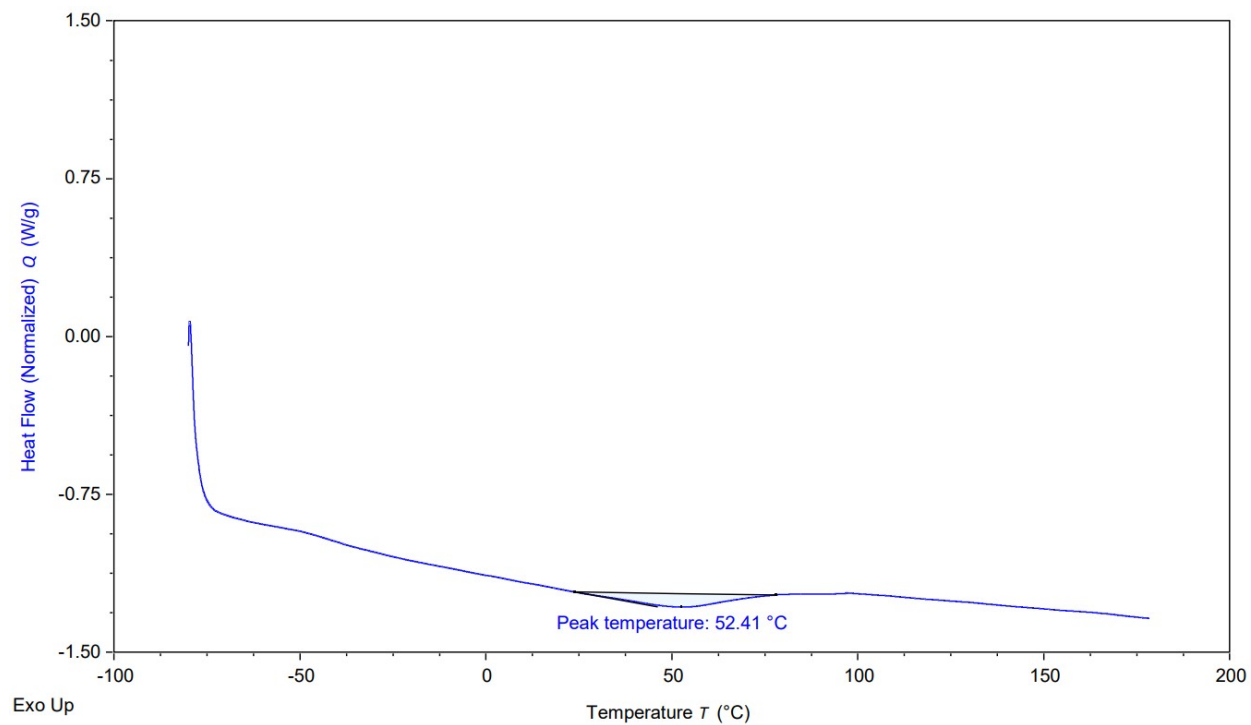

**Figure S82.** DSC trace of poly(*E-co*-2-allylphenol) (Table 3, Entry 10).

### 13. NMR Spectra of 2-allylphenol + DEAC Mixture

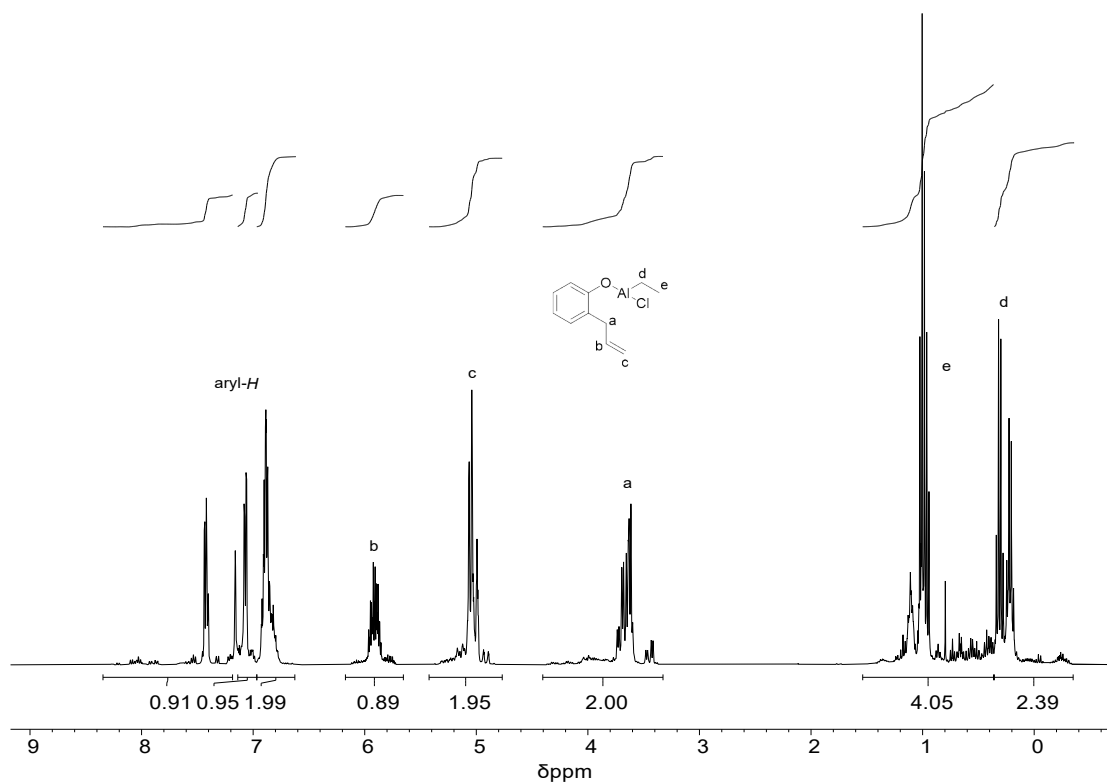

**Figure S83.**  $^1\text{H}$  NMR spectrum (400 MHz) of 2-allylphenol + DEAC (1:1) in  $\text{C}_6\text{D}_6$  at 30 °C for 12 h.

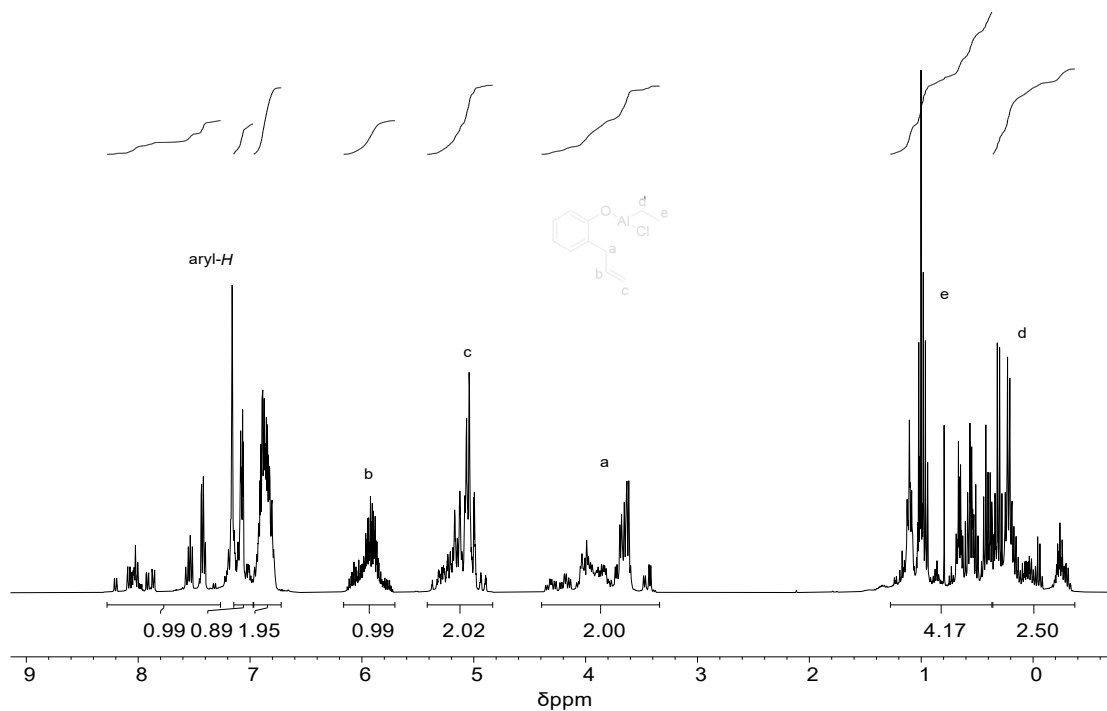

**Figure S84.**  $^1\text{H}$  NMR spectrum (400 MHz) of 2-allylphenol + DEAC (1:1) in  $\text{C}_6\text{D}_6$  after 1 week.

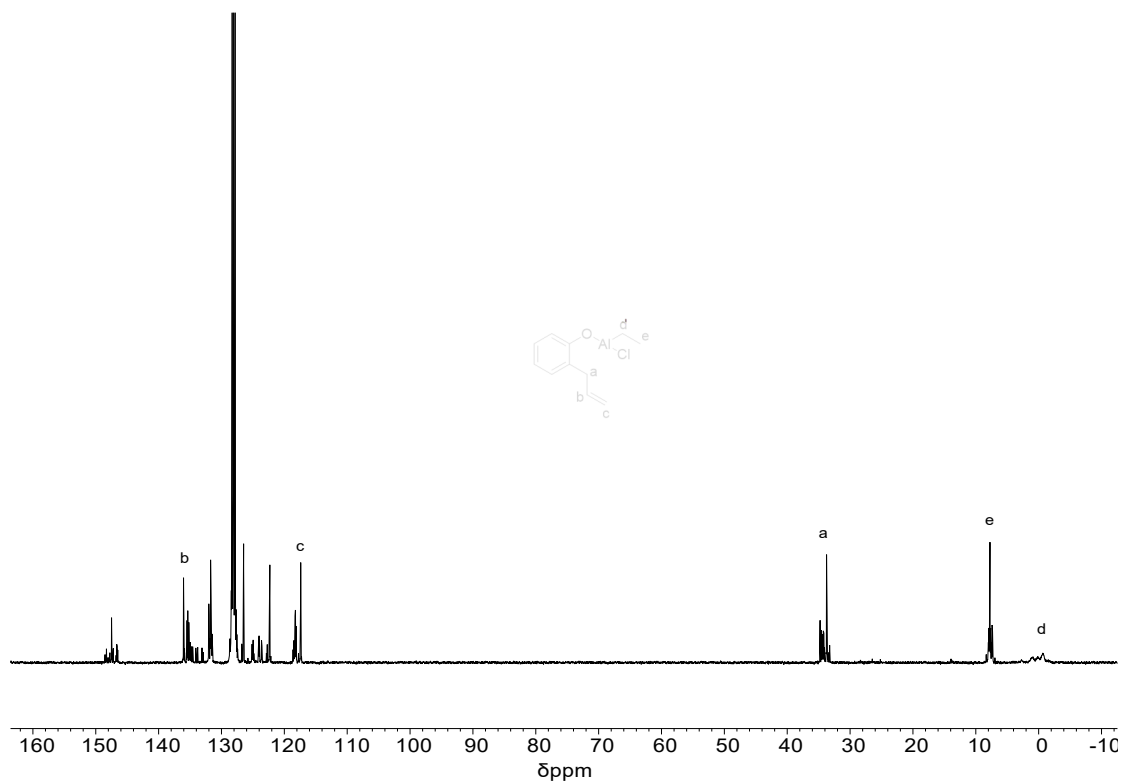

**Figure S85.**  $^{13}\text{C}$  NMR spectrum (100 MHz) of 2-allylphenol + DEAC (1:1) in  $\text{C}_6\text{D}_6$  after 1 week.

## 14. Water Contact Angle Measurements

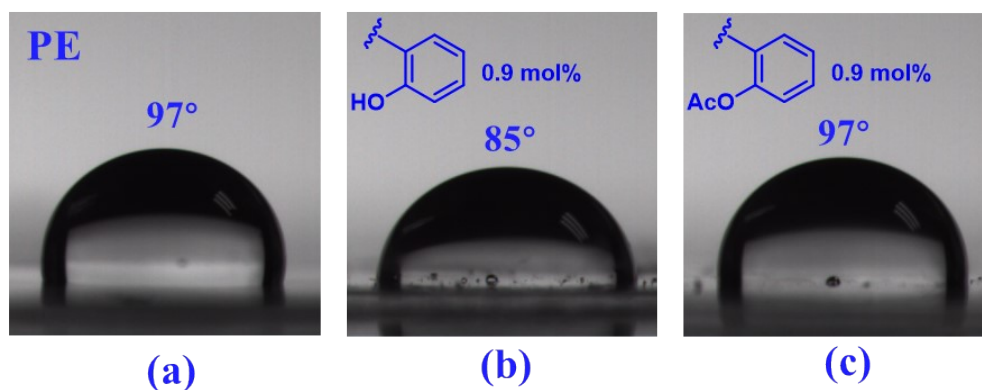

**Figure S86.** Water contact angle measurements on three representative samples: branched PE prepared by ethylene homopolymerization with cat. **c** (a); PE/2-allylphenol copolymer from Table 3, entry 7 (b); the corresponding acetylated copolymer (c).

### References

- [1] H. Jo, M. Choi, M. Viji, Y. Lee, Y. Kwak, K. Lee, N. Choi, Y. Lee, H. Lee, J. Hong, M. Lee, J. Jung, *Molecules* 2015, **20**, 15966-15975.
- [2] P. Sun, Z. Zhang, X. Wang, L. Li, Y. Li, Z. Li, *Chin. J. Chem.* 2022, **40**, 1066-1072.
- [3] T. Xiong, Y. Li, L. Mao, Q. Zhang, Q. Zhang, *Chem. Commun.* 2012, **48**, 2246-2248.
- [4] X. Wang, Z. Li, B. K. Mai, J. A. Gurak, J. E. Xu, V. T. Tran, H. Ni, Z. Liu, Z. Liu, K. S. Yang, R. Xiang, P. Liu, *Chem. Sci.* 2020, **11**, 11307-11314.
- [5] T. Wiedemann, G. Voit, A. Tchernook, P. Roesle, I. Göttker-Schnetmann, S. Mecking, *J. Am. Chem. Soc.* 2014, **136**, 2078-2085.
- [6] Y. Gao, J. Chen, Y. Wang, D. B. Pickens, A. Motta, Q. J. Wang, Y. Chung, T. L. Lohr, T. J. Marks, *Nat. Catal.* 2019, **2**, 236-242.
